# Supplementary material for: Summer temperature maxima already challenge thermal capacities of coral in the Southern Persian/Arabian Gulf
Source: Research Square preprint supplement (doi:10.21203/rs.3.rs-8231598/v1), 2025-12-04
Supplement: Supplementary file 1 [file 1b9e774b04c5992171473d30.xlsx]

## Sheet: profiles
ITS2 type profile UID		1089571	1089991	1089459	1089375	1089667	1089490	1093373	1092935	1092939	1090831	1090834	1092931	1090974	1091856	1093582	1090950	1090959	1090833	1090970	1091101	1092932	1092934	1092937	1092938	1093708	1091927	1093613	1093618	1093621	1093627	1090942	1094013	1094018	1094672	1094008	1094038	1094205	1094053	1094054	1094590	1094718	1094597	1094737
Clade		A	A	A	A	A	A	C	C	C	C	C	C	C	C	C	C	C	C	C	C	C	C	C	C	C	C	C	C	C	C	C	D	D	D	D	D	D	D	D	D	D	D	D
Majority ITS2 sequence		A1	A1	A1	A1	A1	A1	C3	C3	C3	C3	C3	C3	C3	C3	C41/C41b	C15h/C3	C3	C3	C3	C3	C3	C3	C3yc	C3	C15ed	C3	C3	C41	C3	C15	C15h	D17a	D5a	D1	D5	D1	D1	D1	D5a	D1	D1	D1	D4c
Associated species		None	None	None	None	None	None	None	None	None	None	None	None	None	None	None	None	None	None	None	None	None	None	None	None	None	None	None	None	None	None	None	None	None	None	None	None	None	None	None	None	None	None	None
ITS2 profile abundance local		14	9	3	2	1	1	10	7	6	5	5	5	4	3	3	2	1	1	1	1	1	1	1	1	1	1	1	1	1	1	1	6	5	4	3	2	2	1	1	1	1	1	1
ITS2 profile abundance DB		72	347	92	38	34	8	20	136	57	146	26	26	96	8	26	19	6	7	14	14	9	4	16	4	12	9	6	34	136	116	25	111	55	9	69	187	17	12	31	9	9	20	37
ITS2 type profile		A1-A1bw-A1bx	A1	A1-A1bw-A1bf-A1bx-A1eb	A1-A1m	A1-A1bw	A1/A1j	C3-C3l-C3hg-C3abl-C3qh-C3gm	C3-C3gulf-C3d-C3i-C115c-C115b-C3ak-C3ai-C18a	C3-C3cc-C3gulf-C3abk	C3/C3c-C3gulf	C3-C3gulf-C3c-C3am-C3jd	C3-C3gulf-C3cc	C3-C3gulf-C3c-C3aj-C3am	C3-C3gulf-C3by-C3c-C3cc-C3abp	C41/C41b	C15h/C3-C15o-C15k	C3-C3gulf-C3d-C3i-C3ak-C115c-C3ai-C115b	C3-C3gulf-C3c-C3am-C3ja	C3-C3gulf-C3d-C3i-C115c-C115b-C3ak	C3/C15h-C3gulf-C3c	C3-C3gulf-C3cd-C3dz	C3-C3d-C3gulf-C3i-C115c-C3ai-C3ak	C3yd/C3yc-C3-C3gulf	C3-C1qs	C15ed	C3-C3gulf-C41	C3-C3tc	C41	C3	C15	C15h-C15o-C15k	D1/D17a-D4-D17-D1g	D5/D5a-D4-D4a-D2	D1-D6-D4-D2.2-D5-D2-D17bg	D5-D5a-D5f-D4	D1/D4/D4c-D1h	D1/D4/D5-D4c	D5/D1-D4-D5a	D5/D5a-D4-D4a-D4b	D1/D5	D1/D2-D2ac	D1/D6-D2.2	D4c
211438	UAE_SA_Cmic08_MetaG	0	0	0	0	0	0	0.841804	0	0	0	0	0	0	0	0	0	0	0	0	0	0	0	0	0	0	0	0	0	0	0	0	0	0	0	0	0	0	0	0	0	0	0	0
211439	UAE_SA_Cmic09_MetaG	0	0	0	0	0	0	0.840277	0	0	0	0	0	0	0	0	0	0	0	0	0	0	0	0	0	0	0	0	0	0	0	0	0	0	0	0	0	0	0	0	0	0	0	0
211433	UAE_SA_Cmic03_MetaG	0	0	0	0	0	0	0.837183	0	0	0	0	0	0	0	0	0	0	0	0	0	0	0	0	0	0	0	0	0	0	0	0	0	0	0	0	0	0	0	0	0	0	0	0
211436	UAE_SA_Cmic06_MetaG	0.0232731	0	0	0	0	0	0.827949	0	0	0	0	0	0	0	0	0	0	0	0	0	0	0	0	0	0	0	0	0	0	0	0	0	0	0	0	0	0	0	0	0	0	0	0
211437	UAE_SA_Cmic07_MetaG	0.0258376	0	0	0	0	0	0.818488	0	0	0	0	0	0	0	0	0	0	0	0	0	0	0	0	0	0	0	0	0	0	0	0	0	0	0	0	0	0	0	0	0	0	0	0
211440	UAE_SA_Cmic10_MetaG	0	0	0.0279859	0	0	0	0.81254	0	0	0	0	0	0	0	0	0	0	0	0	0	0	0	0	0	0	0	0	0	0	0	0	0	0	0	0	0	0	0	0	0	0	0	0
211431	UAE_SA_Cmic01_MetaG	0.038145	0	0	0	0	0	0.808314	0	0	0	0	0	0	0	0	0	0	0	0	0	0	0	0	0	0	0	0	0	0	0	0	0	0	0	0	0	0	0	0	0	0	0	0
211434	UAE_SA_Cmic04_MetaG	0	0	0.103458	0	0	0	0.750006	0	0	0	0	0	0	0	0	0	0	0	0	0	0	0	0	0	0	0	0	0	0	0	0	0	0	0	0	0	0	0	0	0	0	0	0
211432	UAE_SA_Cmic02_MetaG	0	0	0.139553	0	0	0	0.650003	0	0	0	0	0	0	0	0	0	0	0	0	0	0	0	0	0	0	0	0	0	0	0	0	0	0	0	0	0	0	0	0	0	0	0	0
211435	UAE_SA_Cmic05_MetaG	0	0	0	0	0.380131	0	0.528	0	0	0	0	0	0	0	0	0	0	0	0	0	0	0	0	0	0	0	0	0	0	0	0	0	0	0	0	0	0	0	0	0	0	0	0
211472	UAE_SI_Phar02_MetaG	0	1	0	0	0	0	0	0	0	0	0	0	0	0	0	0	0	0	0	0	0	0	0	0	0	0	0	0	0	0	0	0	0	0	0	0	0	0	0	0	0	0	0
211479	UAE_SI_Phar09_MetaG	0	0.999869	0	0	0	0	0	0	0	0	0	0	0	0	0	0	0	0	0	0	0	0	0	0	0	0	0	0	0	0	0	0	0	0	0	0	0	0	0	0	0	0	0
211473	UAE_SI_Phar03_MetaG	0	0.999072	0	0	0	0	0	0	0	0	0	0	0	0	0	0	0	0	0	0	0	0	0	0	0	0	0	0	0	0	0	0	0	0	0	0	0	0	0	0	0	0	0
211475	UAE_SI_Phar05_MetaG	0	0.999005	0	0	0	0	0	0	0	0	0	0	0	0	0	0	0	0	0	0	0	0	0	0	0	0	0	0	0	0	0	0	0	0	0	0	0	0	0	0	0	0	0
211471	UAE_SI_Phar01_MetaG	0	0.914627	0	0	0	0	0	0	0	0	0	0	0	0	0	0.0734613	0	0	0	0	0	0	0	0	0	0	0	0	0	0	0	0	0	0	0	0	0.0064776	0	0	0	0	0	0
211476	UAE_SI_Phar06_MetaG	0	0.72441	0	0	0	0	0	0	0	0	0	0	0	0	0	0	0	0	0	0	0	0	0	0	0.0199127	0.114978	0	0	0	0.0162882	0	0	0	0	0	0	0	0	0	0.0668559	0	0	0.0144978
211493	UAE_SY_Pdae03_MetaG	0	0	0	0	0	0	0	0.908779	0	0	0	0	0	0	0	0	0	0	0	0	0	0	0	0	0	0	0	0	0	0	0	0	0	0	0	0	0	0	0	0	0	0	0
211498	UAE_SY_Pdae08_MetaG	0	0	0	0	0	0	0	0.902671	0	0	0	0	0	0	0	0	0	0	0	0	0	0	0	0	0	0	0	0	0	0	0	0	0	0	0	0	0	0	0	0	0	0	0
211497	UAE_SY_Pdae07_MetaG	0	0	0	0	0	0	0	0.901154	0	0	0	0	0	0	0	0	0	0	0	0	0	0	0	0	0	0	0	0	0	0	0	0	0	0	0	0	0	0	0	0	0	0	0
211494	UAE_SY_Pdae04_MetaG	0	0	0	0	0	0	0	0.900628	0	0	0	0	0	0	0	0	0	0	0	0	0	0	0	0	0	0	0	0	0	0	0	0	0	0	0	0	0	0	0	0	0	0	0
211500	UAE_SY_Pdae10_MetaG	0	0	0	0	0	0.0238772	0	0.888198	0	0	0	0	0	0	0	0	0	0	0	0	0	0	0	0	0	0	0	0	0	0	0	0	0	0	0	0	0	0	0	0	0	0	0
211492	UAE_SY_Pdae02_MetaG	0	0	0	0.0390164	0	0	0	0.829643	0	0	0	0	0	0	0	0	0	0	0	0	0	0	0	0	0	0	0	0	0	0	0	0	0	0	0	0	0	0	0	0	0	0	0
211491	UAE_SY_Pdae01_MetaG	0	0	0	0.416749	0	0	0	0.462759	0	0	0	0	0	0	0	0	0	0	0	0	0	0	0	0	0	0	0	0	0	0	0	0	0	0	0	0	0	0	0	0	0	0	0
211456	UAE_SI_Cmic06_MetaG	0	0	0	0	0	0	0	0	0	0	0	0	0	0	0	0	0	0	0	0	0	0	0	0	0	0	0	0	0	0	0	0.994716	0	0	0	0	0	0	0	0	0	0	0
211452	UAE_SI_Cmic02_MetaG	0	0	0	0	0	0	0	0	0	0	0	0	0	0	0	0	0	0	0	0	0	0	0	0	0	0	0	0	0	0	0	0.984042	0	0	0	0	0	0	0	0	0	0	0
211457	UAE_SI_Cmic07_MetaG	0	0	0	0	0	0	0	0	0	0	0	0	0	0	0	0	0	0	0	0	0	0	0	0	0	0	0	0	0	0	0	0.979335	0	0	0	0	0	0	0	0	0	0	0
211459	UAE_SI_Cmic09_MetaG	0	0	0	0	0	0	0	0	0	0	0	0	0	0	0	0	0	0	0	0	0	0	0	0	0	0	0	0	0	0	0	0.977861	0	0	0	0	0	0	0	0	0	0	0
211460	UAE_SI_Cmic10_MetaG	0	0	0	0	0	0	0	0	0	0	0	0	0	0	0	0	0	0	0	0	0	0	0	0	0	0	0	0	0	0	0	0.965297	0	0	0	0	0	0	0	0	0	0	0
211451	UAE_SI_Cmic01_MetaG	0	0	0	0	0	0	0	0	0	0	0	0	0	0	0	0	0	0	0	0	0	0	0	0	0	0	0	0	0	0	0.154811	0.836537	0	0	0	0	0	0	0	0	0	0	0
211445	UAE_SA_Phar05_MetaG	0	0	0	0	0	0	0	0	0.983346	0	0	0	0	0	0	0	0	0	0	0	0	0	0	0	0	0	0	0	0	0	0	0	0	0	0	0	0	0	0	0	0	0	0
211443	UAE_SA_Phar03_MetaG	0	0	0	0	0	0	0	0	0.979153	0	0	0	0	0	0	0	0	0	0	0	0	0	0	0	0	0	0	0	0	0	0	0	0	0	0	0	0	0	0	0	0	0	0
211446	UAE_SA_Phar06_MetaG	0	0	0	0	0	0	0	0	0.977049	0	0	0	0	0	0	0	0	0	0	0	0	0	0	0	0	0	0	0	0	0	0	0	0	0	0	0	0	0	0	0	0	0	0
211444	UAE_SA_Phar04_MetaG	0	0	0	0	0	0	0	0	0.9492	0	0	0	0	0	0	0	0	0	0	0	0	0	0	0	0	0	0	0	0	0	0	0	0	0	0	0	0	0	0	0	0	0	0
211441	UAE_SA_Phar01_MetaG	0	0	0	0	0	0	0	0	0.949141	0	0	0	0	0	0	0	0	0	0	0	0	0	0	0	0	0	0	0	0	0	0	0	0	0	0	0	0	0	0	0	0	0	0
211442	UAE_SA_Phar02_MetaG	0	0	0	0	0	0	0	0	0.948341	0	0	0	0	0	0	0	0	0	0	0	0	0	0	0	0	0	0	0	0	0	0	0	0	0	0	0	0	0	0	0	0	0	0
211464	UAE_SI_Pdae04_MetaG	0	0	0	0	0	0	0	0	0	0	0	0	0	0	0	0	0	0	0	0	0	0	0	0	0	0	0	0	0	0	0	0	0.943603	0	0	0	0	0	0	0	0	0	0
211463	UAE_SI_Pdae03_MetaG	0	0	0	0	0	0	0	0	0	0	0	0	0	0	0	0	0	0	0	0	0	0	0	0	0	0	0	0	0	0	0	0	0.91764	0	0	0	0	0	0	0	0	0	0
211466	UAE_SI_Pdae06_MetaG	0	0	0	0	0	0	0	0	0	0	0	0	0	0	0	0	0	0	0	0	0	0	0	0	0	0	0	0	0	0	0	0	0.916718	0	0	0	0	0	0	0	0	0	0
211465	UAE_SI_Pdae05_MetaG	0	0	0	0	0	0	0	0	0	0	0	0	0	0	0.0143558	0	0	0	0	0.0519038	0	0	0	0	0	0	0	0	0	0	0	0	0.847048	0	0	0	0	0	0	0	0	0.0283592	0
211461	UAE_SI_Pdae01_MetaG	0	0.0549091	0	0	0	0	0	0	0	0	0	0	0	0	0.0037075	0	0	0	0	0	0	0	0	0	0	0	0.0243699	0	0	0	0	0	0.838526	0	0	0	0	0	0	0	0	0	0
211503	UAE_SY_Phar03_MetaG	0	0	0	0	0	0	0	0	0	0.960306	0	0	0	0	0	0	0	0	0	0	0	0	0	0	0	0	0	0	0	0	0	0	0	0	0	0	0	0	0	0	0	0	0
211504	UAE_SY_Phar04_MetaG	0	0	0	0	0	0	0	0	0	0.952309	0	0	0	0	0	0	0	0	0	0	0	0	0	0	0	0	0	0	0	0	0	0	0	0	0	0	0	0	0	0	0	0	0
211502	UAE_SY_Phar02_MetaG	0	0	0	0	0	0	0	0	0	0.941479	0	0	0	0	0	0	0	0	0	0	0	0	0	0	0	0	0	0	0	0	0	0	0	0	0	0	0	0	0	0	0	0	0
211510	UAE_SY_Phar10_MetaG	0.00724858	0	0	0	0	0	0	0	0	0.941343	0	0	0	0	0	0	0	0	0	0	0	0	0	0	0	0	0	0	0	0	0	0	0	0	0	0	0	0	0	0	0	0	0
211509	UAE_SY_Phar09_MetaG	0	0	0	0	0	0	0	0	0	0.927653	0	0	0	0	0	0	0	0	0	0	0	0	0	0	0	0	0	0	0	0	0	0	0	0	0	0	0	0	0	0	0	0	0
211483	UAE_SY_Cmic03_MetaG	0.0171488	0	0	0	0	0	0	0	0	0	0.854267	0	0	0	0	0	0	0	0	0	0	0	0	0	0	0	0	0	0	0	0	0	0	0	0	0	0	0	0	0	0	0	0
211487	UAE_SY_Cmic07_MetaG	0.033837	0	0	0	0	0	0	0	0	0	0.842665	0	0	0	0	0	0	0	0	0	0	0	0	0	0	0	0	0	0	0	0	0	0	0	0	0	0	0	0	0	0	0	0
211482	UAE_SY_Cmic02_MetaG	0.0722786	0	0	0	0	0	0	0	0	0	0.796993	0	0	0	0	0	0	0	0	0	0	0	0	0	0	0	0	0	0	0	0	0	0	0	0	0	0	0	0	0	0	0	0
211486	UAE_SY_Cmic06_MetaG	0.134024	0	0	0	0	0	0	0	0	0	0.757283	0	0	0	0	0	0	0	0	0	0	0	0	0	0	0	0	0	0	0	0	0	0	0	0	0	0	0	0	0	0	0	0
211484	UAE_SY_Cmic04_MetaG	0.143964	0	0	0	0	0	0	0	0	0	0.745317	0	0	0	0	0	0	0	0	0	0	0	0	0	0	0	0	0	0	0	0	0	0	0	0	0	0	0	0	0	0	0	0
211506	UAE_SY_Phar06_MetaG	0	0	0	0	0	0	0	0	0	0	0	0.962877	0	0	0	0	0	0	0	0	0	0	0	0	0	0	0	0	0	0	0	0	0	0	0	0	0	0	0	0	0	0	0
211501	UAE_SY_Phar01_MetaG	0	0	0	0	0	0	0	0	0	0	0	0.954579	0	0	0	0	0	0	0	0	0	0	0	0	0	0	0	0	0	0	0	0	0	0	0	0	0	0	0	0	0	0	0
211507	UAE_SY_Phar07_MetaG	0	0	0	0	0	0	0	0	0	0	0	0.943285	0	0	0	0	0	0	0	0	0	0	0	0	0	0	0	0	0	0	0	0	0	0	0	0	0	0	0	0	0	0	0
211505	UAE_SY_Phar05_MetaG	0	0	0	0	0	0	0	0	0	0	0	0.942465	0	0	0	0	0	0	0	0	0	0	0	0	0	0	0	0	0	0	0	0	0	0	0	0	0	0	0	0	0	0	0
211450	UAE_SA_Phar10_MetaG	0	0	0	0	0	0	0	0	0	0	0	0.842013	0	0	0	0	0	0	0	0	0	0	0	0	0	0	0	0	0	0	0	0	0	0	0	0	0	0	0	0	0	0	0
211454	UAE_SI_Cmic04_MetaG	0	0	0	0	0	0	0	0	0	0	0	0	0	0	0	0	0	0	0	0	0	0	0	0	0	0	0	0	0	0	0	0	0	0.960881	0	0	0	0	0	0	0	0	0
211455	UAE_SI_Cmic05_MetaG	0	0	0	0	0	0	0	0	0	0	0	0	0	0	0	0	0	0	0	0	0	0	0	0	0	0	0	0	0	0	0	0	0	0.957596	0	0	0	0	0	0	0	0	0
211458	UAE_SI_Cmic08_MetaG	0	0	0	0	0	0	0	0	0	0	0	0	0	0	0	0	0	0	0	0	0	0	0	0	0	0	0	0	0	0	0	0	0	0.939989	0	0	0	0	0	0	0	0	0
211453	UAE_SI_Cmic03_MetaG	0	0	0	0	0	0	0	0	0	0	0	0	0	0	0	0	0	0	0	0	0	0	0	0	0	0	0	0	0	0	0	0	0	0.918463	0	0	0	0	0	0	0	0	0
211489	UAE_SY_Cmic09_MetaG	0	0	0	0	0	0	0	0	0	0	0	0	0.848808	0	0	0	0	0	0	0	0	0	0	0	0	0	0	0	0	0	0	0	0	0	0	0	0	0	0	0	0	0	0
211481	UAE_SY_Cmic01_MetaG	0.0598101	0	0	0	0	0	0	0	0	0	0	0	0.822328	0	0	0	0	0	0	0	0	0	0	0	0	0	0	0	0	0	0	0	0	0	0	0	0	0	0	0	0	0	0
211488	UAE_SY_Cmic08_MetaG	0.0918821	0	0	0	0	0	0	0	0	0	0	0	0.809257	0	0	0	0	0	0	0	0	0	0	0	0	0	0	0	0	0	0	0	0	0	0	0	0	0	0	0	0	0	0
211490	UAE_SY_Cmic10_MetaG	0.196604	0	0	0	0	0	0	0	0	0	0	0	0.708546	0	0	0	0	0	0	0	0	0	0	0	0	0	0	0	0	0	0	0	0	0	0	0	0	0	0	0	0	0	0
211448	UAE_SA_Phar08_MetaG	0	0	0	0	0	0	0	0	0	0	0	0	0	0.94293	0	0	0	0	0	0	0	0	0	0	0	0	0	0	0	0	0	0	0	0	0	0	0	0	0	0	0	0	0
211447	UAE_SA_Phar07_MetaG	0.0151195	0	0	0	0	0	0	0	0	0	0	0	0	0.915738	0	0	0	0	0	0	0	0	0	0	0	0	0	0	0	0	0	0	0	0	0	0	0	0	0	0	0	0	0
211449	UAE_SA_Phar09_MetaG	0	0	0	0	0	0	0	0	0	0	0	0	0	0.883315	0	0	0	0	0	0	0	0	0	0	0	0	0	0	0	0	0	0	0	0	0	0	0	0	0	0	0	0	0
211470	UAE_SI_Pdae10_MetaG	0	0	0	0	0	0	0	0	0	0	0	0	0	0	0	0	0	0	0	0	0	0	0	0	0	0	0	0	0	0	0	0	0	0	0.892718	0	0	0	0	0	0	0	0
211469	UAE_SI_Pdae09_MetaG	0	0	0	0	0	0	0	0	0	0	0	0	0	0	0	0	0	0	0	0	0	0	0	0	0	0	0	0	0	0	0	0	0	0	0.886613	0	0	0	0	0	0	0	0
211468	UAE_SI_Pdae08_MetaG	0	0	0	0	0	0	0	0	0	0	0	0	0	0	0	0	0	0	0	0	0	0	0	0	0	0	0	0	0	0	0	0	0	0	0.879581	0	0	0	0	0	0	0	0
211474	UAE_SI_Phar04_MetaG	0	0	0	0	0	0	0	0	0	0	0	0	0	0	0	0	0	0	0	0	0	0	0	0	0	0	0	0	0	0	0	0	0	0	0	0.999466	0	0	0	0	0	0	0
211477	UAE_SI_Phar07_MetaG	0	0	0	0	0	0	0	0	0	0	0	0	0	0	0	0	0	0	0	0	0	0	0	0	0	0	0	0	0	0	0	0	0	0	0	0.995044	0	0	0	0	0	0	0
211499	UAE_SY_Pdae09_MetaG	0	0	0	0	0	0	0	0	0	0	0	0	0	0	0	0	0.929449	0	0	0	0	0	0	0	0	0	0	0	0	0	0	0	0	0	0	0	0	0	0	0	0	0	0
211485	UAE_SY_Cmic05_MetaG	0.141356	0	0	0	0	0	0	0	0	0	0	0	0	0	0	0	0	0.756258	0	0	0	0	0	0	0	0	0	0	0	0	0	0	0	0	0	0	0	0	0	0	0	0	0
211496	UAE_SY_Pdae06_MetaG	0	0	0	0	0	0	0	0	0	0	0	0	0	0	0	0	0	0	0.850743	0	0	0	0	0	0	0	0	0	0	0	0	0	0	0	0	0	0	0	0	0	0.005943	0	0
211467	UAE_SI_Pdae07_MetaG	0	0	0	0	0	0	0	0	0	0	0	0	0	0	0	0	0	0	0	0	0	0	0	0	0	0	0	0.0285613	0.0791065	0	0	0	0	0	0	0	0	0.678409	0	0	0	0	0
211462	UAE_SI_Pdae02_MetaG	0	0.0271347	0	0	0	0	0	0	0	0	0	0	0	0	0.00157011	0.0180362	0	0	0	0	0	0	0	0	0	0	0	0	0	0	0	0	0	0	0	0	0	0	0.864044	0	0	0	0
211508	UAE_SY_Phar08_MetaG	0	0	0	0	0	0	0	0	0	0	0	0	0	0	0	0	0	0	0	0	0.873654	0	0	0	0	0	0	0	0	0	0	0	0	0	0	0	0	0	0	0	0	0	0
211495	UAE_SY_Pdae05_MetaG	0	0	0	0	0	0	0	0	0	0	0	0	0	0	0	0	0	0	0	0	0	0.843728	0	0	0	0	0	0	0	0	0	0	0	0	0	0	0	0	0	0	0	0	0
211478	UAE_SI_Phar08_MetaG	0	0.0142508	0	0	0	0	0	0	0	0	0	0	0	0	0	0	0	0	0	0	0	0	0.939479	0	0	0	0	0	0	0	0	0	0	0	0	0	0.0156149	0	0	0	0	0	0
211480	UAE_SI_Phar10_MetaG	0	0	0	0	0	0	0	0	0	0	0	0	0	0	0	0	0	0	0	0	0	0	0	0.97195	0	0	0	0	0	0	0	0	0	0	0	0	0	0	0	0	0	0	0
Sequence accession / SymPortal UID		883-968-976	883	883-968-976-914-1888	883-4521	883-968	883-3849	32-23316-23458-4684301-3575-23471	32-18740-23336-895-20976-23339-23340-23337-20886	32-37337-18740-1450953	32-18740-2518	32-18740-2518-22202-23346	32-18740-37337	32-18740-2518-22202-23343	32-18740-24791-2518-28434-37337		1584/32-10815-2460	32-23336-18740-895-20976-23339-23340-23337	32-18740-2518-22202-23690	32-23336-18740-895-20976-23339-23340	32-1584-18740-2518	32-18740-53704-53991	32-23336-18740-895-23337-20976-23340	333118-103111-32-18740	32-3292992	775	32-857-18740	32-2300	857	32	517	1584-10815-2460	23290-853-854-1739-12732	22600-1732-854-23310-855	853-933-10403-854-1732-855-25526	1732-22600-854-23295	853-854-1730-1752	853-854-1730-1732	853-1732-854-22600	22600-1732-854-23310-23369	853-1732	853-53637-855	853-933-10403	1730
Average defining sequence proportions and [stdev]		0.964[0.013]-0.022[0.009]-0.014[0.005]	1.000[0.000]	0.910[0.016]-0.034[0.002]-0.025[0.011]-0.023[0.002]-0.009[0.001]	0.962[0.004]-0.038[0.004]	0.995[nan]-0.005[nan]	0.956[nan]-0.044[nan]	0.598[0.058]-0.186[0.027]-0.098[0.019]-0.042[0.012]-0.040[0.009]-0.036[0.004]	0.521[0.020]-0.126[0.023]-0.091[0.020]-0.076[0.014]-0.063[0.019]-0.040[0.015]-0.035[0.008]-0.030[0.010]-0.018[0.004]	0.835[0.025]-0.083[0.019]-0.060[0.011]-0.022[0.014]	0.757[0.024]-0.229[0.023]-0.014[0.003]	0.646[0.012]-0.130[0.009]-0.116[0.014]-0.062[0.007]-0.046[0.005]	0.755[0.020]-0.202[0.037]-0.043[0.023]	0.661[0.008]-0.130[0.011]-0.122[0.009]-0.054[0.016]-0.032[0.006]	0.665[0.039]-0.199[0.049]-0.040[0.014]-0.033[0.023]-0.031[0.010]-0.031[0.020]	0.593[0.316]/0.407[0.316]	0.575[0.413]/0.317[0.432]-0.068[0.005]-0.040[0.015]	0.526[nan]-0.123[nan]-0.092[nan]-0.085[nan]-0.063[nan]-0.042[nan]-0.034[nan]-0.034[nan]	0.646[nan]-0.171[nan]-0.104[nan]-0.044[nan]-0.035[nan]	0.451[nan]-0.165[nan]-0.127[nan]-0.115[nan]-0.081[nan]-0.036[nan]-0.024[nan]	0.395[nan]-0.377[nan]-0.131[nan]-0.097[nan]	0.781[nan]-0.126[nan]-0.054[nan]-0.039[nan]	0.515[nan]-0.166[nan]-0.114[nan]-0.088[nan]-0.051[nan]-0.050[nan]-0.016[nan]	0.538[nan]-0.313[nan]-0.082[nan]-0.067[nan]	0.929[nan]-0.071[nan]	1.000[nan]	0.340[nan]-0.338[nan]-0.322[nan]	0.737[nan]-0.263[nan]	1.000[nan]	1.000[nan]	1.000[nan]	0.875[nan]-0.074[nan]-0.051[nan]	0.442[0.010]-0.373[0.006]-0.091[0.007]-0.050[0.010]-0.044[0.008]	0.652[0.019]-0.258[0.009]-0.045[0.009]-0.033[0.003]-0.012[0.003]	0.355[0.019]-0.182[0.009]-0.160[0.008]-0.151[0.017]-0.064[0.027]-0.046[0.003]-0.043[0.013]	0.691[0.061]-0.198[0.043]-0.070[0.006]-0.041[0.024]	0.776[0.012]-0.107[0.011]-0.106[0.003]-0.010[0.001]	0.666[0.032]-0.153[0.011]-0.100[0.051]-0.080[0.029]	0.539[nan]-0.263[nan]-0.131[nan]-0.067[nan]	0.695[nan]-0.225[nan]-0.041[nan]-0.032[nan]-0.007[nan]	0.692[nan]-0.308[nan]	0.936[nan]-0.051[nan]-0.013[nan]	0.624[nan]-0.213[nan]-0.163[nan]	1.000[nan]
540_20241128T075405_DBV_20241130T041509.profiles.relative.abund_and_meta

## Sheet: sequences
sample_uid	sample_name	fastq_fwd_file_name	fastq_fwd_sha256_file_hash	fastq_rev_file_name	fastq_rev_sha256_file_hash	data_set_uid	data_set_name	raw_contigs	post_qc_absolute_seqs	post_qc_unique_seqs	post_taxa_id_absolute_symbiodiniaceae_seqs	post_taxa_id_unique_symbiodiniaceae_seqs	size_screening_violation_absolute	size_screening_violation_unique	post_taxa_id_absolute_non_symbiodiniaceae_seqs	post_taxa_id_unique_non_symbiodiniaceae_seqs	post_med_absolute	post_med_unique	noName Clade A	noName Clade B	noName Clade C	noName Clade D	noName Clade E	noName Clade F	noName Clade G	noName Clade H	noName Clade I	sample_type	host_phylum	host_class	host_order	host_family	host_genus	host_species	collection_latitude	collection_longitude	collection_date	collection_depth	A1	A1bw	A1lz	A1m	3293003_A	A1bx	A13c	65422_A	A1eb	A1bf	54328_A
211438	UAE_SA_Cmic08_MetaG	Q2181278B8_20240125115143__UAE_SA_Cmic_08_field_MetaG_S200_R1_001.fastq.gz	3f5b58ce117ccdeae65a6e34f1e1c5645401509adaae5b51f8a5532b2a66520e	Q2181278B8_20240125115143__UAE_SA_Cmic_08_field_MetaG_S200_R2_001.fastq.gz	bdd36cec75aee6e39bdd85d7451e836a22db39630801ff0bed27865eef58ad83	1099	20241126T130812_colinlu1	1.47401	1.03922	0.0132518	1.0149	0.0126207	0.0243192	0.000631037	0	0	1	0.000922285	0	0	0.0732489	0	0	0	0	0	0	coral_field	cnidaria	anthozoa	scleractinia	Merulinidae	Cyphastrea	microphthalma	24.0852	52.2433	20220603	2025-06-02	0	0	0	0	0	0	0	0	0	0	0
211439	UAE_SA_Cmic09_MetaG	Q2181281BR_20240125115143__UAE_SA_Cmic_09_field_MetaG_S201_R1_001.fastq.gz	70fba82ed93a4ad9d871dcf48917571101262bc069a296321283b05e4e6116bd	Q2181281BR_20240125115143__UAE_SA_Cmic_09_field_MetaG_S201_R2_001.fastq.gz	b6e59219b0c2c723edb9190ccea384fe1b524d4f95781848c8c444525a95742f	1099	20241126T130812_colinlu1	1.46367	1.03203	0.0146637	1.01018	0.0139575	0.0218502	0.000706185	0	0	1	0.000872347	0	0	0.0718232	0	0	0	0	0	0	coral_field	cnidaria	anthozoa	scleractinia	Merulinidae	Cyphastrea	microphthalma	24.0852	52.2433	20220603	2025-06-02	0.00340631	0	0	0	0	0	0	0	0	0	0
211433	UAE_SA_Cmic03_MetaG	Q2181263BT_20240125115143__UAE_SA_Cmic_03_field_MetaG_S195_R1_001.fastq.gz	f7d4175723b02a5607fe0412d1377bc4df00fe21063442456270b4e9e2bf7991	Q2181263BT_20240125115143__UAE_SA_Cmic_03_field_MetaG_S195_R2_001.fastq.gz	28b9045b1ba26273f68af37796cc63b5fc61276663aef6da9e687bd99aaeb2a6	1099	20241126T130812_colinlu1	1.46988	1.04141	0.0144686	1.01266	0.0136708	0.0287558	0.000797766	0	0	1	0.000797766	0	0	0.0761867	0	0	0	0	0	0	coral_field	cnidaria	anthozoa	scleractinia	Merulinidae	Cyphastrea	microphthalma	24.0852	52.2433	20220603	2025-06-02	0.00112413	0	0	0	0	0	0	0	0	0	0
211436	UAE_SA_Cmic06_MetaG	Q2181272BS_20240125115143__UAE_SA_Cmic_06_field_MetaG_S198_R1_001.fastq.gz	dc2238cacefc642b8f32d7deafcfed791dfb271d38f35b1d6bd433794528c164	Q2181272BS_20240125115143__UAE_SA_Cmic_06_field_MetaG_S198_R2_001.fastq.gz	b098ac0a16a2a08732c3437cf60e4600139ff092f6fc7fc2e037bed9dfb7f1f3	1099	20241126T130812_colinlu1	1.46086	1.04435	0.0142047	1.01307	0.0134963	0.0312788	0.000708466	0	0	1	0.000814736	0	0	0.071378	0	0	0	0	0	0	coral_field	cnidaria	anthozoa	scleractinia	Merulinidae	Cyphastrea	microphthalma	24.0852	52.2433	20220603	2025-06-02	0.0226355	0.000283386	0	0	0	0.000354233	0	0	0	0	0
211437	UAE_SA_Cmic07_MetaG	Q2181275BI_20240125115143__UAE_SA_Cmic_07_field_MetaG_S199_R1_001.fastq.gz	33629b8cdbec46616be904bcb2b733dce17ecbae1f646c0af8bba2a61f6da954	Q2181275BI_20240125115143__UAE_SA_Cmic_07_field_MetaG_S199_R2_001.fastq.gz	7f6b58f026cbc05d0003371e6a41bd0ecb80ab299cbcf0bf676aa8bab6b9c419	1099	20241126T130812_colinlu1	1.47578	1.03659	0.0146021	1.01582	0.0139125	0.0204429	0.000648982	0.000324491	4.05614e-05	1	0.0010546	0.000527298	0	0.069076	0	0	0	0	0	0	coral_field	cnidaria	anthozoa	scleractinia	Merulinidae	Cyphastrea	microphthalma	24.0852	52.2433	20220603	2025-06-02	0.024783	0.000730105	0	0	0	0.000324491	0	0	0.000202807	0	0
211440	UAE_SA_Cmic10_MetaG	Q2181284BH_20240125115144__UAE_SA_Cmic_10_field_MetaG_S202_R1_001.fastq.gz	f509bc4fda871999aba9494c1daf4dfa5c8cef30a710ce4a2a422989cf98183c	Q2181284BH_20240125115144__UAE_SA_Cmic_10_field_MetaG_S202_R2_001.fastq.gz	b15481a9cffe7980c45d2394f05b63ed7c168898a676c956bd605459d5f7b9cc	1099	20241126T130812_colinlu1	1.45664	1.03949	0.0136896	1.0192	0.0131621	0.0200992	0.000501161	0.000184638	2.63769e-05	1	0.000738552	0	0	0.0734068	0	0	0	0	0	0	coral_field	cnidaria	anthozoa	scleractinia	Merulinidae	Cyphastrea	microphthalma	24.0852	52.2433	20220603	2025-06-02	0.0249525	0.00100232	0	0	0	0.00105507	0.000131884	0	0.000263769	0.000712176	0
211431	UAE_SA_Cmic01_MetaG	Q2181257BK_20240125115143__UAE_SA_Cmic_01_field_MetaG_S193_R1_001.fastq.gz	a23a9c496a0944fe16451d969e296d75e64e593592c531e5996918852921200e	Q2181257BK_20240125115143__UAE_SA_Cmic_01_field_MetaG_S193_R2_001.fastq.gz	7635bbbdb053855686c818c4c2848d9eafdaa38d5b6366386b67db8adf4b06ae	1099	20241126T130812_colinlu1	1.47712	1.04132	0.0143484	1.01486	0.0136118	0.0264549	0.000736636	0	0	1	0.000832719	0.000352304	0	0.0697242	0	0	0	0	0	0	coral_field	cnidaria	anthozoa	scleractinia	Merulinidae	Cyphastrea	microphthalma	24.0852	52.2433	20220603	2025-06-02	0.0366076	0.00108894	0	0	0	0.000448387	0	0	0.000384332	0	0
211434	UAE_SA_Cmic04_MetaG	Q2181266BJ_20240125115143__UAE_SA_Cmic_04_field_MetaG_S196_R1_001.fastq.gz	72b63edbf2e8030989bc5a8c26e755f1877ffbb1adc2afa5f937196217e7a3f3	Q2181266BJ_20240125115143__UAE_SA_Cmic_04_field_MetaG_S196_R2_001.fastq.gz	e382285be2f13601872d3a1366c35d56c2ddb858e00ddd3670482fdafd3b6b9e	1099	20241126T130812_colinlu1	1.43565	1.03378	0.0135805	1.01445	0.013067	0.019331	0.000513439	0	0	1	0.000693143	0.00138629	0	0.0669525	0	0	0	0	0	0	coral_field	cnidaria	anthozoa	scleractinia	Merulinidae	Cyphastrea	microphthalma	24.0852	52.2433	20220603	2025-06-02	0.0953457	0.00331168	0	0	0	0.00174569	0	0	0.000898519	0.00215644	0
211432	UAE_SA_Cmic02_MetaG	Q2181260B5_20240125115143__UAE_SA_Cmic_02_field_MetaG_S194_R1_001.fastq.gz	98499ec1caeddfcc514d3619cfa7c4bad0de409378f0a23fe67204f7828da2fd	Q2181260B5_20240125115143__UAE_SA_Cmic_02_field_MetaG_S194_R2_001.fastq.gz	67b752b4c8ccf71bc84360078eab29726a05d41fb74eb975d23577a44d8a83b9	1099	20241126T130812_colinlu1	1.47397	1.02616	0.0147518	1.00997	0.0143057	0.0161856	0.000446059	0	0	1	0.000892118	0	0	0.0934812	0	0	0	0	0	0	coral_field	cnidaria	anthozoa	scleractinia	Merulinidae	Cyphastrea	microphthalma	24.0852	52.2433	20220603	2025-06-02	0.127828	0.00461989	0	0	0	0.00283566	0	0	0.00114701	0.00312241	0
211435	UAE_SA_Cmic05_MetaG	Q2181269B9_20240125115143__UAE_SA_Cmic_05_field_MetaG_S197_R1_001.fastq.gz	31d5c361e37b0fbeaeb9f782f7ba480218920270069406b1317c3003730cb60f	Q2181269B9_20240125115143__UAE_SA_Cmic_05_field_MetaG_S197_R2_001.fastq.gz	ee6e446f2794a65497dbc363a633b596f41d4faa2964416ce797769d9c1bf277	1099	20241126T130812_colinlu1	1.46065	1.03765	0.0159108	1.02016	0.0154861	0.0174962	0.000424665	0	0	1	0.000622841	0	0	0.0429477	0	0	0	0	0	0	coral_field	cnidaria	anthozoa	scleractinia	Merulinidae	Cyphastrea	microphthalma	24.0852	52.2433	20220603	2025-06-02	0.378376	0.00175528	0	0	0	0	0	0	0	0	0
211472	UAE_SI_Phar02_MetaG	Q2181380BP_20240125115147__UAE_SI_Phar_02_field_MetaG_S234_R1_001.fastq.gz	00da84506607ee1cf1f905d599af1d2b89eece18cef1c33e6b219fbf8a37da4e	Q2181380BP_20240125115147__UAE_SI_Phar_02_field_MetaG_S234_R2_001.fastq.gz	9c79b8727e193a2834e6da279e37bdb11553ec703e044626eb010fba2d3796ce	1099	20241126T130812_colinlu1	1.40944	1.00093	0.0117076	1.00093	0.0117076	0	0	0	0	1	3.21636e-05	0	0	0	0	0	0	0	0	0	coral_field	cnidaria	anthozoa	scleractinia	Poritidae	Porites	harrisoni	25.4917	56.3639	20220523	2025-05-04	1	0	0	0	0	0	0	0	0	0	0
211479	UAE_SI_Phar09_MetaG	Q2181401BH_20240125115147__UAE_SI_Phar_09_field_MetaG_S241_R1_001.fastq.gz	38f4ab56e5ab99040c221c78b8efa7e589f882476b5ae289e4502f9b978552cd	Q2181401BH_20240125115148__UAE_SI_Phar_09_field_MetaG_S241_R2_001.fastq.gz	d5d445f430b909f46c251d6abc0577b7a9f5e7bc4ad63e05f0cea9fe81318b7e	1099	20241126T130812_colinlu1	1.3627	1.00097	0.0112812	1.00084	0.0112551	0	0	0.000130873	2.61746e-05	1	5.23492e-05	0	0	0	0	0	0	0	0	0	coral_field	cnidaria	anthozoa	scleractinia	Poritidae	Porites	harrisoni	25.4917	56.3639	20220523	2025-04-02	0.999869	0	0	0	0	0	0	0	0	0	0
211473	UAE_SI_Phar03_MetaG	Q2181383BF_20240125115147__UAE_SI_Phar_03_field_MetaG_S235_R1_001.fastq.gz	bea164e8ac9520e36bd9c03ab34c086f45635ef5209fe70e02d7b44097aae709	Q2181383BF_20240125115147__UAE_SI_Phar_03_field_MetaG_S235_R2_001.fastq.gz	8a65ee2da3422ac4354b2a9f4fb7fc6fa5371d4bd6215437171d46f6b6ab7e9e	1099	20241126T130812_colinlu1	1.31775	1.00104	0.0103214	1.00104	0.0103214	0	0	0	0	1	8.84056e-05	0	0	0	0	0	0	0	0	0	coral_field	cnidaria	anthozoa	scleractinia	Poritidae	Porites	harrisoni	25.4917	56.3639	20220523	2025-05-04	0.999072	0	0	0	0	0	0	0	0	0	0
211475	UAE_SI_Phar05_MetaG	Q2181026E6_20241105163934__UAE_SI_Phar_05_field_MetaG_S248_R1_001.fastq.gz	36767a3b8130159ddd8410a4b22a5b15ca7a640513101bb0487c959733dd0bd3	Q2181026E6_20241105163934__UAE_SI_Phar_05_field_MetaG_S248_R2_001.fastq.gz	0c17a87121ffe2894397be3a5bf9eccb78f5300ef6b3783430d3d3e8f90fecc0	1099	20241126T130812_colinlu1	1.34292	1.00103	0.00721285	1.00099	0.00720042	3.73079e-05	1.2436e-05	0	0	1	6.21798e-05	0	0	0	0	0	0	0	0	0	coral_field	cnidaria	anthozoa	scleractinia	Poritidae	Porites	harrisoni	25.4917	56.3639	20220523	2025-05-04	0.999005	0	0	0	0	0	0	0	0	0	0
211471	UAE_SI_Phar01_MetaG	Q2181377B6_20240125115147__UAE_SI_Phar_01_field_MetaG_S233_R1_001.fastq.gz	565ec263dce82ca29c3908f88fcd264fbff5999aee47a49112aede86fcb02f15	Q2181377B6_20240125115147__UAE_SI_Phar_01_field_MetaG_S233_R2_001.fastq.gz	12ccd7095a658f932de21ca76e94eceaafd34272979851830e708cf4340a9267	1099	20241126T130812_colinlu1	1.33671	1.00313	0.0108203	1.00313	0.0108203	0	0	0	0	1	0.000388171	0	0	0	0	0	9.70426e-05	0	0	0	coral_field	cnidaria	anthozoa	scleractinia	Poritidae	Porites	harrisoni	25.4917	56.3639	20220523	2025-05-04	0.914627	0	0	0	0	0	0	0	0	0	0
211476	UAE_SI_Phar06_MetaG	Q2181392BE_20240125115147__UAE_SI_Phar_06_field_MetaG_S238_R1_001.fastq.gz	ca0fa0a0fed607e0e57fcdc7b54a9a93f545a31b4261265b74188f0b1b2f5b3e	Q2181392BE_20240125115147__UAE_SI_Phar_06_field_MetaG_S238_R2_001.fastq.gz	6d7147cac06d2fdaced4e5e70fc476e875006155be75e9a63c0b4c33b2e7bdc9	1099	20241126T130812_colinlu1	1.40777	1.00275	0.010262	1.00275	0.010262	0	0	0	0	1	0.000524017	0	0	0	0.000393013	0	0	0	0	0	coral_field	cnidaria	anthozoa	scleractinia	Poritidae	Porites	harrisoni	25.4917	56.3639	20220523	2025-04-02	0.72441	0	0	0	0	0	0	0	0	0	0
211493	UAE_SY_Pdae03_MetaG	Q2181443BR_20240125115148__UAE_SY_Pdae_03_field_MetaG_S255_R1_001.fastq.gz	9ada369c9d0eeab17c3bb89c8cffce0b345ce4eddedb87fd391029dbf84dd211	Q2181443BR_20240125115148__UAE_SY_Pdae_03_field_MetaG_S255_R2_001.fastq.gz	5d5f01e2946b65ffa05fd0a4bc0f39d2355bc92eeb6028b27ecb601cbe3ed493	1099	20241126T130812_colinlu1	1.40519	1.02958	0.013604	1.01555	0.013436	0.0140358	0.00016795	0	0	1	0.000335901	0	0	0	0	0	0	0	0	0	coral_field	cnidaria	anthozoa	scleractinia	Merulinidae	Platygyra	daedalea	24.5995	54.4227	20220518	2025-07-02	0	0	0	0	0	0	0	0	0	0	0
211498	UAE_SY_Pdae08_MetaG	Q2181458B6_20240125115149__UAE_SY_Pdae_08_field_MetaG_S260_R1_001.fastq.gz	f6bd3c045d9eef00418c774feaf975e960da71f4de6647dc5185682cd592bef6	Q2181458B6_20240125115149__UAE_SY_Pdae_08_field_MetaG_S260_R2_001.fastq.gz	f204808142ae2b584106c26fd4378efc180419203f14e55ed9b5552c0cb2af03	1099	20241126T130812_colinlu1	1.4288	1.02204	0.0113435	1.0074	0.0111703	0.0146339	0.000173183	0	0	1	0.000692731	0	0	0	0	0	0	0	0	0	coral_field	cnidaria	anthozoa	scleractinia	Merulinidae	Platygyra	daedalea	24.5995	54.4227	20220518	2025-07-02	0	0	0	0	0	0	0	0	0	0	0
211497	UAE_SY_Pdae07_MetaG	Q2181455BG_20240125115149__UAE_SY_Pdae_07_field_MetaG_S259_R1_001.fastq.gz	00f981ef46ec968dab31412ebc79cc7f00c709089dfd5a9bdc658e7360dc7415	Q2181455BG_20240125115149__UAE_SY_Pdae_07_field_MetaG_S259_R2_001.fastq.gz	5c72ac705ec1605adbc88316808c3b56ec600db43cbb5c1900fcf67b32625ef6	1099	20241126T130812_colinlu1	1.46458	1.01996	0.0123376	1.00827	0.0121925	0.0116844	0.000145148	0	0	1	0.000762029	0.000471732	0	0.011757	0	0	0	0	0	0	coral_field	cnidaria	anthozoa	scleractinia	Merulinidae	Platygyra	daedalea	24.5995	54.4227	20220518	2025-07-02	0.00217723	0	0	0	0	0	0	0	0	0	0
211494	UAE_SY_Pdae04_MetaG	Q2181446BH_20240125115149__UAE_SY_Pdae_04_field_MetaG_S256_R1_001.fastq.gz	3ec549916196499913f670e65bf66435d416b7a9f6295e2e2a2ce2f8e3a23203	Q2181446BH_20240125115149__UAE_SY_Pdae_04_field_MetaG_S256_R2_001.fastq.gz	781da3755ca1c622be43b2ddf1bf254b87af7863cb824df15741406386b684b5	1099	20241126T130812_colinlu1	1.426	1.02874	0.0115976	1.01423	0.0113148	0.0145112	0.000282869	0	0	1	0.000480878	0	0	0.021979	0	0	0	0	0	0	coral_field	cnidaria	anthozoa	scleractinia	Merulinidae	Platygyra	daedalea	24.5995	54.4227	20220518	2025-07-02	0	0	0	0	0	0	0	0	0	0	0
211500	UAE_SY_Pdae10_MetaG	Q2181029EU_20241105163934__UAE_SY_Pdae_10_field_MetaG_S272_R1_001.fastq.gz	bdc7a1e68b7728c11ecc6b50df52c578e71b8d5e02916bc834473ad6dd564280	Q2181029EU_20241105163934__UAE_SY_Pdae_10_field_MetaG_S272_R2_001.fastq.gz	86044efd188e636dd778ea0d248c36611994a7d5c2d00e1b99c796da837d14bf	1099	20241126T130812_colinlu1	1.34908	1.02633	0.012363	1.01502	0.0122523	0.0113112	0.000110713	0	0	1	0.000424401	0.00177141	0	0	0	0	0	0	0	0	coral_field	cnidaria	anthozoa	scleractinia	Merulinidae	Platygyra	daedalea	24.5995	54.4227	20220518	2025-07-02	0.0228254	0	0	0	0	0.000147618	0	0.000461306	0	0	0
211492	UAE_SY_Pdae02_MetaG	Q2181440B3_20240125115148__UAE_SY_Pdae_02_field_MetaG_S254_R1_001.fastq.gz	4cf91b45a984c508114d22af89354ab421f5bad4756573d81fc20bb5bdff2e26	Q2181440B3_20240125115148__UAE_SY_Pdae_02_field_MetaG_S254_R2_001.fastq.gz	fa83a4dca3c007a024e1751daa6eaa1b167150ceb3b3f8b33e4d81fc70b5e45e	1099	20241126T130812_colinlu1	1.45243	1.0267	0.013285	1.01698	0.0130837	0.00972893	0.000201288	0	0	1	0.000805153	0.00194579	0	0.0184179	0	0	0	0	0	0	coral_field	cnidaria	anthozoa	scleractinia	Merulinidae	Platygyra	daedalea	24.5995	54.4227	20220518	2025-07-02	0.0376409	0.000503221	0.00154321	0.00137547	0.00154321	0.000301932	0.00114063	0	0	0	0.000402576
211491	UAE_SY_Pdae01_MetaG	Q2181437BI_20240125115148__UAE_SY_Pdae_01_field_MetaG_S253_R1_001.fastq.gz	a7c60818e4146997cd7b9ff049e41e0deeb06ffaeb3296776355c8c062311b78	Q2181437BI_20240125115148__UAE_SY_Pdae_01_field_MetaG_S253_R2_001.fastq.gz	532ffc69d672d1f246fbbb5ec5fa805cf239e6bfd66705dc03b6c4ec267a9dc6	1099	20241126T130812_colinlu1	1.46418	1.02813	0.0131855	1.01952	0.0130002	0.00809042	0.000154397	0.000524951	3.08794e-05	1	0.000679348	0.0209671	0	0.0230361	0	0	0	0	0	0	coral_field	cnidaria	anthozoa	scleractinia	Merulinidae	Platygyra	daedalea	24.5995	54.4227	20220518	2025-07-02	0.39958	0	0.0191761	0.017169	0.0167984	0	0.0131238	0	0	0	0.00416873
211456	UAE_SI_Cmic06_MetaG	Q2181332B6_20240125115146__UAE_SI_Cmic_06_field_MetaG_S218_R1_001.fastq.gz	29cd8a55f49214fad8149c17da2e9a9cb8affc2373b06054f4f2884ae655d3c3	Q2181332B6_20240125115146__UAE_SI_Cmic_06_field_MetaG_S218_R2_001.fastq.gz	d605d171cdf137065eff79e133d04fcb75d480d988890bfa496489823ccf13e1	1099	20241126T130812_colinlu1	1.42926	1.0229	0.0139781	1.02281	0.0139497	8.52321e-05	2.84107e-05	0	0	1	0.000170464	0	0	0	0.00528439	0	0	0	0	0	coral_field	cnidaria	anthozoa	scleractinia	Merulinidae	Cyphastrea	microphthalma	25.4917	56.3639	20220527	2025-05-02	0	0	0	0	0	0	0	0	0	0	0
211452	UAE_SI_Cmic02_MetaG	Q2181320BH_20240125115145__UAE_SI_Cmic_02_field_MetaG_S214_R1_001.fastq.gz	137619dbba565a3715d192bfee1ee397ffff96b6c6660f3ba0a961d0f23ea1ba	Q2181320BH_20240125115145__UAE_SI_Cmic_02_field_MetaG_S214_R2_001.fastq.gz	c6e958f25645038df5676c256e551f54e5d8ba684d1427abd79fd45db17ea185	1099	20241126T130812_colinlu1	1.4625	1.01466	0.0150436	1.01466	0.0150436	0	0	0	0	1	0.000221637	0	0	0	0.00623355	0	0	0	0	0	coral_field	cnidaria	anthozoa	scleractinia	Merulinidae	Cyphastrea	microphthalma	25.4917	56.3639	20220527	2025-05-02	0	0	0	0	0	0	0	0	0	0	0
211457	UAE_SI_Cmic07_MetaG	Q2181335BU_20240125115146__UAE_SI_Cmic_07_field_MetaG_S219_R1_001.fastq.gz	9ddf7d2f0a9fba82a78709f00b0eca0ecf11dcfcebb0fe2a38cdc9271860720b	Q2181335BU_20240125115146__UAE_SI_Cmic_07_field_MetaG_S219_R2_001.fastq.gz	ec4ae1bbac29038163dfab2effd7f615cdb2db276de9784688dc05f8f33aaf77	1099	20241126T130812_colinlu1	1.48397	1.0215	0.0138559	1.02141	0.0138261	8.92008e-05	2.97336e-05	0	0	1	0.000237869	0	0	0	0.00859301	0	0	0	0	0	coral_field	cnidaria	anthozoa	scleractinia	Merulinidae	Cyphastrea	microphthalma	25.4917	56.3639	20220527	2025-05-02	0	0	0	0	0	0	0	0	0	0	0
211459	UAE_SI_Cmic09_MetaG	Q2181341B5_20240125115146__UAE_SI_Cmic_09_field_MetaG_S221_R1_001.fastq.gz	687b19c6a73be90bde00b5df12b9b18304f33f3722bb96d8031ab3a6f011ce6e	Q2181341B5_20240125115146__UAE_SI_Cmic_09_field_MetaG_S221_R2_001.fastq.gz	bc5a0c7727aba0521cd1091924004f3d781ea34aa2cb59f6ada6ff67e7c16104	1099	20241126T130812_colinlu1	1.48159	1.01456	0.0139393	1.01445	0.0139003	0.000117137	3.90457e-05	0	0	1	0.000429503	0	0	0	0.00663777	0	0	0	0	0	coral_field	cnidaria	anthozoa	scleractinia	Merulinidae	Cyphastrea	microphthalma	25.4917	56.3639	20220527	2025-05-02	0	0	0	0	0	0	0	0	0	0	0
211460	UAE_SI_Cmic10_MetaG	Q2181344BT_20240125115146__UAE_SI_Cmic_10_field_MetaG_S222_R1_001.fastq.gz	b4ad9d21c2a9d12e04e20d4ef638b26c696701f90e59d841891c68ab751012e2	Q2181344BT_20240125115146__UAE_SI_Cmic_10_field_MetaG_S222_R2_001.fastq.gz	4f59e6af7c1e2c646cd6fa9a41653bd8a6ad3b4fe9c5b80db4b645719510d18f	1099	20241126T130812_colinlu1	1.51296	1.01783	0.0139051	1.01783	0.0139051	0	0	0	0	1	0.000359615	0	0	0	0.0247535	0	0	0	0	0	coral_field	cnidaria	anthozoa	scleractinia	Merulinidae	Cyphastrea	microphthalma	25.4917	56.3639	20220527	2025-05-02	0	0	0	0	0	0	0	0	0	0	0
211451	UAE_SI_Cmic01_MetaG	Q2181317BW_20240125115145__UAE_SI_Cmic_01_field_MetaG_S213_R1_001.fastq.gz	1ef133bdbfd4ad04593495c9d276ab6c77b758e853be4322f7a0e3d12a0fd1e4	Q2181317BW_20240125115145__UAE_SI_Cmic_01_field_MetaG_S213_R2_001.fastq.gz	2c726345a21e4a4109a3c52726a9313fbaa73bf33f14204afd9d1897a00d5d99	1099	20241126T130812_colinlu1	1.46217	1.0209	0.015308	1.02055	0.0152282	0.000106491	2.66227e-05	0.000239604	5.32453e-05	1	0.000372717	0	0	0.00151749	0.00436611	0	0	0	0	0	coral_field	cnidaria	anthozoa	scleractinia	Merulinidae	Cyphastrea	microphthalma	25.4917	56.3639	20220527	2025-05-02	0	0	0	0	0	0	0	0	0	0	0
211445	UAE_SA_Phar05_MetaG	Q2181299BU_20240125115144__UAE_SA_Phar_05_field_MetaG_S207_R1_001.fastq.gz	bb97c6185ebcf1b2369a746a7e57ac8286ef710c8a923f9a120c7f8a67dde47b	Q2181299BU_20240125115144__UAE_SA_Phar_05_field_MetaG_S207_R2_001.fastq.gz	a4f2dfabc7bd567b69d8a371e84a5ea90cee5236892c62827e891f2de8fc5fb6	1099	20241126T130812_colinlu1	1.37248	1.02701	0.0124362	1.0239	0.0124146	0	0	0.00311446	2.16282e-05	1	0.000151397	0	0	0.0166537	0	0	0	0	0	0	coral_field	cnidaria	anthozoa	scleractinia	Poritidae	Porites	harrisoni	24.0852	52.2433	20220530	2025-06-02	0	0	0	0	0	0	0	0	0	0	0
211443	UAE_SA_Phar03_MetaG	Q2181293BG_20240125115144__UAE_SA_Phar_03_field_MetaG_S205_R1_001.fastq.gz	43586dbc87f706696f1c4ee16ae44886b6faa00d252004026d113e079cf69054	Q2181293BG_20240125115144__UAE_SA_Phar_03_field_MetaG_S205_R2_001.fastq.gz	e6b1294bff89e3e371f22b6b64638a5bff8c9f819e4523d4dc198b6dedf0025c	1099	20241126T130812_colinlu1	1.36905	1.02475	0.0131432	1.01718	0.0130651	0	0	0.00757359	7.80782e-05	1	0.000234235	0	0	0.0206647	0	0	0	0	0	0	coral_field	cnidaria	anthozoa	scleractinia	Poritidae	Porites	harrisoni	24.0852	52.2433	20220530	2025-06-02	0.000182183	0	0	0	0	0	0	0	0	0	0
211446	UAE_SA_Phar06_MetaG	Q2181302BJ_20240125115145__UAE_SA_Phar_06_field_MetaG_S208_R1_001.fastq.gz	b11ce2456bacf7f4be61722a27a0cc3d1af444ef91443cd9fa56da4682a8cca5	Q2181302BJ_20240125115145__UAE_SA_Phar_06_field_MetaG_S208_R2_001.fastq.gz	3a32273b3c7274db23db599cf3cd37461d7243093ecaf92f30df07ea451f1de9	1099	20241126T130812_colinlu1	1.39143	1.02404	0.0125808	1.01654	0.0125536	0	0	0.00750484	2.72903e-05	1	0.000218323	0	0	0.0229512	0	0	0	0	0	0	coral_field	cnidaria	anthozoa	scleractinia	Poritidae	Porites	harrisoni	24.0852	52.2433	20220530	2025-06-02	0	0	0	0	0	0	0	0	0	0	0
211444	UAE_SA_Phar04_MetaG	Q2181296B6_20240125115144__UAE_SA_Phar_04_field_MetaG_S206_R1_001.fastq.gz	e59181c76b206c2c317231b6d1fe3b36d0617b88cd2547c25e7b7565d0edda73	Q2181296B6_20240125115144__UAE_SA_Phar_04_field_MetaG_S206_R2_001.fastq.gz	e7ca52657b64efa93a2904d49153fd4b8e8f50741083ece8d9323f63d793b9b1	1099	20241126T130812_colinlu1	1.38446	1.02345	0.0118804	1.01288	0.0118033	0	0	0.0105689	7.71456e-05	1	0.000501446	0	0	0.0306654	0	0	0	0	0	0	coral_field	cnidaria	anthozoa	scleractinia	Poritidae	Porites	harrisoni	24.0852	52.2433	20220530	2025-06-02	0.00027001	0	0	0	0	0	0	0	0	0	0
211441	UAE_SA_Phar01_MetaG	Q2181287B7_20240125115144__UAE_SA_Phar_01_field_MetaG_S203_R1_001.fastq.gz	f293beb05e22397dcadd19f2b579864176a8b54051c95ef2e242148507ab8bbf	Q2181287B7_20240125115144__UAE_SA_Phar_01_field_MetaG_S203_R2_001.fastq.gz	67c31d242e32f35afdb73b4a00255416d6738a2c43b6a883029322715b7c1557	1099	20241126T130812_colinlu1	1.36675	1.00801	0.0137803	1.00801	0.0137803	0	0	0	0	1	0.000320472	0	0	0.0159274	0	0	0	0	0	0	coral_field	cnidaria	anthozoa	scleractinia	Poritidae	Porites	harrisoni	24.0852	52.2433	20220530	2025-06-02	0.000416613	0	0	0	0	0	0	0	0	0	0
211442	UAE_SA_Phar02_MetaG	Q2181290BQ_20240125115144__UAE_SA_Phar_02_field_MetaG_S204_R1_001.fastq.gz	fb1b0dc57cf8f0a028c6a7271f2074e8b9e11629988e69ff6d3acf0a7b1be5ad	Q2181290BQ_20240125115144__UAE_SA_Phar_02_field_MetaG_S204_R2_001.fastq.gz	71189a358c6a29f7ad367b55657fda9e9821f810b1b6798b963f336c09e01675	1099	20241126T130812_colinlu1	1.37164	1.00849	0.0127967	1.00849	0.0127967	0	0	0	0	1	0.000377299	0	0	0.00855211	0	0	0	0	0	0	coral_field	cnidaria	anthozoa	scleractinia	Poritidae	Porites	harrisoni	24.0852	52.2433	20220530	2025-06-02	0	0	0	0	0	0	0	0	0	0	0
211464	UAE_SI_Pdae04_MetaG	Q2181356BI_20240125115146__UAE_SI_Pdae_04_field_MetaG_S226_R1_001.fastq.gz	f734ec6c1ebe5ac5afeaa11e54444168b3239889968d129372b71e52b7372883	Q2181356BI_20240125115146__UAE_SI_Pdae_04_field_MetaG_S226_R2_001.fastq.gz	8ca771ead6a8949cebcfb2f9bf92f5fc0f8b52ff65acc02d432798b3a147d225	1099	20241126T130812_colinlu1	1.46703	1.02405	0.0135809	1.02378	0.0135474	0.000267603	3.34504e-05	0	0	1	0.000367955	0	0	0	0.00709149	0	0	0	0	0	coral_field	cnidaria	anthozoa	scleractinia	Merulinidae	Platygyra	daedalea	25.4917	56.3639	20220525	2025-05-02	0	0	0	0	0	0	0	0	0	0	0
211463	UAE_SI_Pdae03_MetaG	Q2181353BS_20240125115146__UAE_SI_Pdae_03_field_MetaG_S225_R1_001.fastq.gz	23c362107447edcb14e0d030889cea64aafe3f66838e0e87d539a252804f3045	Q2181353BS_20240125115146__UAE_SI_Pdae_03_field_MetaG_S225_R2_001.fastq.gz	822ff3d6a753543dab08f4d9059e3693e8dbc43558b7463886752477a582ad10	1099	20241126T130812_colinlu1	1.49588	1.02538	0.0139675	1.0248	0.0139073	0.000571945	6.02047e-05	0	0	1	0.000391331	0	0	0	0.00692354	0	0	0	0	0	coral_field	cnidaria	anthozoa	scleractinia	Merulinidae	Platygyra	daedalea	25.4917	56.3639	20220525	2025-05-02	0.000240819	0	0	0	0	0	0	0	0	0	0
211466	UAE_SI_Pdae06_MetaG	Q2181362BR_20240125115147__UAE_SI_Pdae_06_field_MetaG_S228_R1_001.fastq.gz	aaf5d0ee0c72db2363ff6b517505cefab7c165fc6b29f7bc99e526b8e5ebdb6b	Q2181362BR_20240125115147__UAE_SI_Pdae_06_field_MetaG_S228_R2_001.fastq.gz	5cb0f5553f58156e04338403ba045f31321c4308d8b6e5b34c95253e147670ac	1099	20241126T130812_colinlu1	1.4659	1.02531	0.0164962	1.02498	0.0164491	0.000329924	4.7132e-05	0	0	1	0.000754112	0	0	0	0.00749399	0	0	0	0	0	coral_field	cnidaria	anthozoa	scleractinia	Merulinidae	Platygyra	daedalea	25.4917	56.3639	20220525	2025-05-02	0.000518452	0	0	0	0	0	0	0	0	0	0
211465	UAE_SI_Pdae05_MetaG	Q2181359B8_20240125115146__UAE_SI_Pdae_05_field_MetaG_S227_R1_001.fastq.gz	dff5f72215a238bb694f87d8daea9c9bb72f818f428db66e055d799b087abf82	Q2181359B8_20240125115147__UAE_SI_Pdae_05_field_MetaG_S227_R2_001.fastq.gz	ac48e73999768a96a519963f19bb863e0a92fb62675ce179a25496dd7b1b2aa4	1099	20241126T130812_colinlu1	1.43666	1.02469	0.0099815	1.02469	0.0099815	0	0	0	0	1	0.000763292	0	0	0.00449168	0	0	0	0	0	0	coral_field	cnidaria	anthozoa	scleractinia	Merulinidae	Platygyra	daedalea	25.4917	56.3639	20220525	2025-05-02	0	0	0	0	0	0	0	0	0	0	0
211461	UAE_SI_Pdae01_MetaG	Q2181347BJ_20240125115146__UAE_SI_Pdae_01_field_MetaG_S223_R1_001.fastq.gz	39fb808a6a6a602d5ce63453d4cff5059e4aa804ab378f4c969c8efdedb6adc7	Q2181347BJ_20240125115146__UAE_SI_Pdae_01_field_MetaG_S223_R2_001.fastq.gz	30859803cd80b1c535ff9b6aeab9ba0a939af04990c3d23815113c03d46ba4f8	1099	20241126T130812_colinlu1	1.45926	1.01568	0.0103751	1.01511	0.0103312	5.86166e-05	1.46542e-05	0.000512896	2.93083e-05	1	0.000249121	0	0	0.00338511	0.00553927	0	0	0	0	0	coral_field	cnidaria	anthozoa	scleractinia	Merulinidae	Platygyra	daedalea	25.4917	56.3639	20220525	2025-05-02	0.0549091	0	0	0	0	0	0	0	0	0	0
211503	UAE_SY_Phar03_MetaG	Q2181473BE_20240125115149__UAE_SY_Phar_03_field_MetaG_S265_R1_001.fastq.gz	f0e1bbba197fe83b937c7aaf2ae3695958571cdf601426488c4226fa540625f9	Q2181473BE_20240125115149__UAE_SY_Phar_03_field_MetaG_S265_R2_001.fastq.gz	2d19d44ab5f4b081b9fb21ce0222e01111162aebfb79141ea547ba3d61c7a1ed	1099	20241126T130812_colinlu1	1.37117	1.00805	0.0143819	1.00805	0.0143819	0	0	0	0	1	0.000172582	0	0	0	0	0	0	0	0	0	coral_field	cnidaria	anthozoa	scleractinia	Poritidae	Porites	harrisoni	24.5995	54.4227	20220516	2025-07-02	0	0	0	0	0	0	0	0	0	0	0
211504	UAE_SY_Phar04_MetaG	Q2181476B4_20240125115149__UAE_SY_Phar_04_field_MetaG_S266_R1_001.fastq.gz	99a7c27d4f1466515c56e134ab5dafd0f3737798e84f26c79c604d2e12966ded	Q2181476B4_20240125115149__UAE_SY_Phar_04_field_MetaG_S266_R2_001.fastq.gz	9992253f47fa7d60d89aedf60b461d8c83c75249cc92633a7a80c3e46410a2e5	1099	20241126T130812_colinlu1	1.36869	1.01274	0.0134419	1.01274	0.0134419	0	0	0	0	1	0.000145843	0	0	0.0173068	0	0	0	0	0	0	coral_field	cnidaria	anthozoa	scleractinia	Poritidae	Porites	harrisoni	24.5995	54.4227	20220516	2025-07-02	0	0	0	0	0	0	0	0	0	0	0
211502	UAE_SY_Phar02_MetaG	Q2181470BO_20240125115149__UAE_SY_Phar_02_field_MetaG_S264_R1_001.fastq.gz	831b752fd490fecaf1b74b447bbbcc98be6553a33b93c3e9d2fc5b8d64f1b6f2	Q2181470BO_20240125115149__UAE_SY_Phar_02_field_MetaG_S264_R2_001.fastq.gz	66d39d04f794eba52c241e3b669da86dfee1e7b3aa1349ebdb72826976d4cb8f	1099	20241126T130812_colinlu1	1.36859	1.00743	0.0124777	1.00701	0.0124475	0	0	0.000422974	3.02124e-05	1	0.000181274	0	0	0.0225082	0	0	0	0	0	0	coral_field	cnidaria	anthozoa	scleractinia	Poritidae	Porites	harrisoni	24.5995	54.4227	20220516	2025-07-02	0	0	0	0	0	0	0	0	0	0	0
211510	UAE_SY_Phar10_MetaG	Q2181494B2_20240125115150__UAE_SY_Phar_10_field_MetaG_S272_R1_001.fastq.gz	a8b28228be4216c3ca91b455b826735c63f2653a3520e583fde335ebbacb658b	Q2181494B2_20240125115150__UAE_SY_Phar_10_field_MetaG_S272_R2_001.fastq.gz	e52f726b29e67dc5840cb386cc5a6d26672ac4b90dcd1a86b8b538c12b15916d	1099	20241126T130812_colinlu1	1.36028	1.00929	0.0122902	1.00929	0.0122902	0	0	0	0	1	0.000202474	0	0	0.00674239	0	0	0	0	0	0	coral_field	cnidaria	anthozoa	scleractinia	Poritidae	Porites	harrisoni	24.5995	54.4227	20220516	2025-07-02	0.00672214	0.000323959	0	0	0	0.000202474	0	0	0	0	0
211509	UAE_SY_Phar09_MetaG	Q2181491BC_20240125115150__UAE_SY_Phar_09_field_MetaG_S271_R1_001.fastq.gz	ef93f318064506a94141d88a68abf0662b72e2c3043f9509a325bbae0a2ab831	Q2181491BC_20240125115150__UAE_SY_Phar_09_field_MetaG_S271_R2_001.fastq.gz	fe940459407ea02d62dc8448f5136417e092d8da7de8bc8bcd0eae36f41a28ea	1099	20241126T130812_colinlu1	1.34666	1.0051	0.015236	1.0051	0.015236	0	0	0	0	1	0.000285081	0	0	0.0230599	0	0	0	0	0	0	coral_field	cnidaria	anthozoa	scleractinia	Poritidae	Porites	harrisoni	24.5995	54.4227	20220516	2025-07-02	0.002344	0	0	0	0	0	0	0	0	0	0
211483	UAE_SY_Cmic03_MetaG	Q2181413B6_20240125115148__UAE_SY_Cmic_03_field_MetaG_S245_R1_001.fastq.gz	29762eafc98c1fec35fcbc71053fb30b014e392e85dd3b846e953cd1d7bcc1ca	Q2181413B6_20240125115148__UAE_SY_Cmic_03_field_MetaG_S245_R2_001.fastq.gz	2926e2fea6a44aac787d5a1de348ba621ec7ee9bd9d33315ddbc079a467be2b1	1099	20241126T130812_colinlu1	1.43905	1.01727	0.012469	1.01727	0.012469	0	0	0	0	1	0.000502528	0	0	0	0	0	0	0	0	0	coral_field	cnidaria	anthozoa	scleractinia	Merulinidae	Cyphastrea	microphthalma	24.5995	54.4227	20220520	2025-06-05	0.0165206	0.00031408	0	0	0	0.00031408	0	0	0.000188448	0	0
211487	UAE_SY_Cmic07_MetaG	Q2181425BT_20240125115148__UAE_SY_Cmic_07_field_MetaG_S249_R1_001.fastq.gz	3bb5307ce517bf50874b90d62ff2bf1235df6b89f697ab1fb1b9fabe502e59c8	Q2181425BT_20240125115148__UAE_SY_Cmic_07_field_MetaG_S249_R2_001.fastq.gz	3ae14f4cdd74b4906989afc5deb8ab80af481f796afa7fd1956adaa4d75e179f	1099	20241126T130812_colinlu1	1.4214	1.01484	0.0131271	1.01484	0.0131271	0	0	0	0	1	0.000462032	0.00016307	0	0	0	0	0	0	0	0	coral_field	cnidaria	anthozoa	scleractinia	Merulinidae	Cyphastrea	microphthalma	24.5995	54.4227	20220520	2025-06-05	0.0324509	0.000625102	0	0	0	0.000760994	0	0.00016307	0	0	0
211482	UAE_SY_Cmic02_MetaG	Q2181410BG_20240125115148__UAE_SY_Cmic_02_field_MetaG_S244_R1_001.fastq.gz	9422c9de5320c62feed7df71466444fcb314088ab858b6e9ff81cfd3408e1a92	Q2181410BG_20240125115148__UAE_SY_Cmic_02_field_MetaG_S244_R2_001.fastq.gz	e9f767f82111f3493bcef2375c0f411645baeed7ea8f47d2b015b5a95787b523	1099	20241126T130812_colinlu1	1.40779	1.01772	0.0129252	1.01772	0.0129252	0	0	0	0	1	0.000512187	0	0	0.00708023	0	0	0	0	0	0	coral_field	cnidaria	anthozoa	scleractinia	Merulinidae	Cyphastrea	microphthalma	24.5995	54.4227	20220520	2025-06-05	0.0691151	0.00213913	0	0	0	0.00102437	0	0	0.00066283	0	0
211486	UAE_SY_Cmic06_MetaG	Q2181422B5_20240125115148__UAE_SY_Cmic_06_field_MetaG_S248_R1_001.fastq.gz	038f1977eb6225d7a004c57e3f865747c5a20ad92726faa62439025f860297c2	Q2181422B5_20240125115148__UAE_SY_Cmic_06_field_MetaG_S248_R2_001.fastq.gz	f2c7395bc4efe074ab19f3f8d16b16513835007d291d65cee8d81fbbe766118d	1099	20241126T130812_colinlu1	1.40625	1.0169	0.0137292	1.0169	0.0137292	0	0	0	0	1	0.000531942	0.00217843	0	0.0175794	0	0	0	0	0	0	coral_field	cnidaria	anthozoa	scleractinia	Merulinidae	Cyphastrea	microphthalma	24.5995	54.4227	20220520	2025-06-05	0.129211	0.00303967	0	0	0	0.00177314	0	0.00119054	0.000633264	0	0
211484	UAE_SY_Cmic04_MetaG	Q2181416BU_20240125115148__UAE_SY_Cmic_04_field_MetaG_S246_R1_001.fastq.gz	9cb9df2fcdbe1652ad78c86bf4fc5336c754202cf82a8f370c36c1ef6cc3f515	Q2181416BU_20240125115148__UAE_SY_Cmic_04_field_MetaG_S246_R2_001.fastq.gz	6e0b73dc629a4ffbfdffe77a03cf631a203c1667423e70bb74988ac1f0cca2e9	1099	20241126T130812_colinlu1	1.40441	1.0174	0.0133019	1.0174	0.0133019	0	0	0	0	1	0.000368928	0.00157819	0	0	0	0	0	0	0	0	coral_field	cnidaria	anthozoa	scleractinia	Merulinidae	Cyphastrea	microphthalma	24.5995	54.4227	20220520	2025-06-05	0.139762	0.00237754	0	0	0	0.00182414	0	0.000901824	0.000799344	0	0
211506	UAE_SY_Phar06_MetaG	Q2181482BD_20240125115149__UAE_SY_Phar_06_field_MetaG_S268_R1_001.fastq.gz	31162218f0fe1dbdc74c52b5297ac4a1789bd9054f442d2f66760a5cfc31d66e	Q2181482BD_20240125115149__UAE_SY_Phar_06_field_MetaG_S268_R2_001.fastq.gz	6edf4d5245fa0f6c9918e9ae72d409606a03b6479941d1803cf5d0cc593b6598	1099	20241126T130812_colinlu1	1.36263	1.02359	0.0136546	1.02359	0.0136546	0	0	0	0	1	0.000175703	0	0	0.00579819	0	0	0	0	0	0	coral_field	cnidaria	anthozoa	scleractinia	Poritidae	Porites	harrisoni	24.5995	54.4227	20220516	2025-07-02	0	0	0	0	0	0	0	0	0	0	0
211501	UAE_SY_Phar01_MetaG	Q2181467B5_20240125115149__UAE_SY_Phar_01_field_MetaG_S263_R1_001.fastq.gz	af863c5b4792d95dca09234ef6c14600886d76a677783bb22984eb6d30dd4828	Q2181467B5_20240125115149__UAE_SY_Phar_01_field_MetaG_S263_R2_001.fastq.gz	dcff8e025b6ef716d8c4e013f222842e9e48aaf0e9b5f9ba0eec6797ef1281e2	1099	20241126T130812_colinlu1	1.40836	1.0299	0.0137339	1.0299	0.0137339	0	0	0	0	1	0.000226539	0	0	0.0163958	0	0	0	0	0	0	coral_field	cnidaria	anthozoa	scleractinia	Poritidae	Porites	harrisoni	24.5995	54.4227	20220516	2025-07-02	0	0	0	0	0	0	0	0	0	0	0
211507	UAE_SY_Phar07_MetaG	Q2181485B3_20240125115149__UAE_SY_Phar_07_field_MetaG_S269_R1_001.fastq.gz	543aba6ac6e8210eef877d6b400863d0b6427a6c7a7bb548d50971f6be9be42d	Q2181485B3_20240125115149__UAE_SY_Phar_07_field_MetaG_S269_R2_001.fastq.gz	8e96ef73cec127ff10177523aa3da24d5c773e3bfd23a471d027ef57f63c1cf0	1099	20241126T130812_colinlu1	1.40245	1.02409	0.0147427	1.02409	0.0147427	0	0	0	0	1	0.00027505	0	0	0.0198861	0	0	0	0	0	0	coral_field	cnidaria	anthozoa	scleractinia	Poritidae	Porites	harrisoni	24.5995	54.4227	20220516	2025-07-02	0	0	0	0	0	0	0	0	0	0	0
211505	UAE_SY_Phar05_MetaG	Q2181479BS_20240125115149__UAE_SY_Phar_05_field_MetaG_S267_R1_001.fastq.gz	e621f3bd0a2cbe3ccac4862a587af44f0f76aa85d0f99c9f3fa1bedc04759b10	Q2181479BS_20240125115149__UAE_SY_Phar_05_field_MetaG_S267_R2_001.fastq.gz	b70316458909799fd5c88d97d97d92a0dd3616c7a0549ef909b859ff5c2a4973	1099	20241126T130812_colinlu1	1.41912	1.02457	0.0129392	1.02457	0.0129392	0	0	0	0	1	0.000197545	0	0	0.0158777	0	0	0	0	0	0	coral_field	cnidaria	anthozoa	scleractinia	Poritidae	Porites	harrisoni	24.5995	54.4227	20220516	2025-07-02	0	0	0	0	0	0	0	0	0	0	0
211450	UAE_SA_Phar10_MetaG	Q2181314B8_20240125115145__UAE_SA_Phar_10_field_MetaG_S212_R1_001.fastq.gz	ce3ec7d6d7fd32a58de7f645d67131be578ccb751b2ce9e4cb245b172c693227	Q2181314B8_20240125115145__UAE_SA_Phar_10_field_MetaG_S212_R2_001.fastq.gz	78c4e846cb3f8f1edfa40911ac5c664d520bed4b7ae3aa9e4176a22847f4992c	1099	20241126T130812_colinlu1	1.39287	1.01201	0.0124912	1.01201	0.0124912	0	0	0	0	1	0.000366559	0	0	0.0774848	0	0	0	0	0	0	coral_field	cnidaria	anthozoa	scleractinia	Poritidae	Porites	harrisoni	24.0852	52.2433	20220530	2025-06-02	0	0	0	0	0	0	0	0	0	0	0
211454	UAE_SI_Cmic04_MetaG	Q2181027EE_20241105163934__UAE_SI_Cmic_04_field_MetaG_S256_R1_001.fastq.gz	bfd1866246af04a0649924abf2b089cd6f68d05f9b111bcb543cd76ed19902f1	Q2181027EE_20241105163934__UAE_SI_Cmic_04_field_MetaG_S256_R2_001.fastq.gz	ca25752acbcba0c9fadb98b244bdc41f482ef39e687e7476c3c836d06b3368d7	1099	20241126T130812_colinlu1	1.37719	1.03706	0.0161085	1.03706	0.0161085	0	0	0	0	1	0.000172535	0	0	0	0.0253157	0	0	0	0	0	coral_field	cnidaria	anthozoa	scleractinia	Merulinidae	Cyphastrea	microphthalma	25.4917	56.3639	20220527	2025-05-02	0	0	0	0	0	0	0	0	0	0	0
211455	UAE_SI_Cmic05_MetaG	Q2181329BL_20240125115146__UAE_SI_Cmic_05_field_MetaG_S217_R1_001.fastq.gz	a4af4f382e2cda9c47c62f33bbbcb81ce9755e8957c0fbe6c13a907cdd8a8c5b	Q2181329BL_20240125115146__UAE_SI_Cmic_05_field_MetaG_S217_R2_001.fastq.gz	477be81f5dae6db85860deae301d0ea7dc25c99dfb6cd6396b216db6fe5a9f40	1099	20241126T130812_colinlu1	1.48123	1.03006	0.0101654	1.03006	0.0101654	0	0	0	0	1	0.000242558	0	0	0	0.0212348	0	0	0	0	0	coral_field	cnidaria	anthozoa	scleractinia	Merulinidae	Cyphastrea	microphthalma	25.4917	56.3639	20220527	2025-05-02	0	0	0	0	0	0	0	0	0	0	0
211458	UAE_SI_Cmic08_MetaG	Q2181338BK_20240125115146__UAE_SI_Cmic_08_field_MetaG_S220_R1_001.fastq.gz	5884d604fdadfbe151aabfa66fe5157fff0a83e0e69fa0f1bcfd355f0c4e61a9	Q2181338BK_20240125115146__UAE_SI_Cmic_08_field_MetaG_S220_R2_001.fastq.gz	261f96c7ef66ce7a71a4d2a916d3725f52c857ece5ea9010109d403ecf4d2439	1099	20241126T130812_colinlu1	1.58489	1.02922	0.0123388	1.02922	0.0123388	0	0	0	0	1	0.000347194	0	0	0	0.0172262	0	0	0	0	0	coral_field	cnidaria	anthozoa	scleractinia	Merulinidae	Cyphastrea	microphthalma	25.4917	56.3639	20220527	2025-05-02	0	0	0	0	0	0	0	0	0	0	0
211453	UAE_SI_Cmic03_MetaG	Q2181323B7_20240125115146__UAE_SI_Cmic_03_field_MetaG_S215_R1_001.fastq.gz	fb04bd55d16fbb8bee4e8f52bb26d99b8e2a99af73504bc7918c9f557e276ab2	Q2181323B7_20240125115146__UAE_SI_Cmic_03_field_MetaG_S215_R2_001.fastq.gz	ae530d11e0e5996bf0ce05edc0cf1f435bcf8e3eb99f58801c79c10a01682a89	1099	20241126T130812_colinlu1	1.51547	1.02924	0.0105732	1.02924	0.0105732	0	0	0	0	1	0.000431558	0	0	0	0.0274039	0	0	0	0	0	coral_field	cnidaria	anthozoa	scleractinia	Merulinidae	Cyphastrea	microphthalma	25.4917	56.3639	20220527	2025-05-02	0	0	0	0	0	0	0	0	0	0	0
211489	UAE_SY_Cmic09_MetaG	Q2181431B4_20240125115148__UAE_SY_Cmic_09_field_MetaG_S251_R1_001.fastq.gz	af8eb2ad4ecc6d3b021df3c4791167b9bc6ac0661b32828306476fcbe4010d4f	Q2181431B4_20240125115148__UAE_SY_Cmic_09_field_MetaG_S251_R2_001.fastq.gz	4be0802bf08fdf1b2733c46514a7cc368720d2273e105089a0463dcd68838a05	1099	20241126T130812_colinlu1	1.37973	1.01642	0.0127111	1.01642	0.0127111	0	0	0	0	1	0.000360964	0	0	0.0280005	0	0	0	0	0	0	coral_field	cnidaria	anthozoa	scleractinia	Merulinidae	Cyphastrea	microphthalma	24.5995	54.4227	20220520	2025-06-05	0	0	0	0	0	0	0	0	0	0	0
211481	UAE_SY_Cmic01_MetaG	Q2181407BV_20240125115148__UAE_SY_Cmic_01_field_MetaG_S243_R1_001.fastq.gz	e6f135a6be3b38607526593c6cf29d6ea0f381923ebd0167ac83c2f6a6bbbe91	Q2181407BV_20240125115148__UAE_SY_Cmic_01_field_MetaG_S243_R2_001.fastq.gz	3e274efda02c2f3375738e002d7934fdb9af4f799985a8c20e6ed67f58cb6479	1099	20241126T130812_colinlu1	1.3879	1.01294	0.0136779	1.01294	0.0136779	0	0	0	0	1	0.000632911	0.000632911	0	0.0168776	0	0	0	0	0	0	coral_field	cnidaria	anthozoa	scleractinia	Merulinidae	Cyphastrea	microphthalma	24.5995	54.4227	20220520	2025-06-05	0.0575949	0.00161744	0	0	0	0.00059775	0	0	0.000281294	0	0
211488	UAE_SY_Cmic08_MetaG	Q2181428BJ_20240125115148__UAE_SY_Cmic_08_field_MetaG_S250_R1_001.fastq.gz	7334adae8318bfcbeb3953d9f0c27de95c32b03a52154f5fca28d716aefba722	Q2181428BJ_20240125115148__UAE_SY_Cmic_08_field_MetaG_S250_R2_001.fastq.gz	3befb40c2c35c20ea6389fe4d93c43f0abda3b540d479cc9e1f38acf7afd8b9c	1099	20241126T130812_colinlu1	1.40978	1.01233	0.0126745	1.01233	0.0126745	0	0	0	0	1	0.000532015	0.00203417	0	0	0	0	0	0	0	0	coral_field	cnidaria	anthozoa	scleractinia	Merulinidae	Cyphastrea	microphthalma	24.5995	54.4227	20220520	2025-06-05	0.0898166	0.00106403	0	0	0	0.00100144	0	0.000907555	0	0	0
211490	UAE_SY_Cmic10_MetaG	Q2181434BS_20240125115148__UAE_SY_Cmic_10_field_MetaG_S252_R1_001.fastq.gz	384f8363b8e9d48624dcde9b2cb48002f4ed42da7294f1b5e21f793c468009ec	Q2181434BS_20240125115148__UAE_SY_Cmic_10_field_MetaG_S252_R2_001.fastq.gz	fff201d61221fe42032d812ca0a71450a86096d66083fc32c3303a56f2a026b6	1099	20241126T130812_colinlu1	1.40781	1.01836	0.012978	1.01836	0.012978	0	0	0	0	1	0.000517741	0.00165677	0	0.0184316	0	0	0	0	0	0	coral_field	cnidaria	anthozoa	scleractinia	Merulinidae	Cyphastrea	microphthalma	24.5995	54.4227	20220520	2025-06-05	0.192634	0.00231258	0	0	0	0.00165677	0	0.00165677	0	0	0
211448	UAE_SA_Phar08_MetaG	Q2181308BX_20240125115145__UAE_SA_Phar_08_field_MetaG_S210_R1_001.fastq.gz	4e7d8084dd5aa1f77defeb73d96e7d45b285f382938c017d28a2192cc0531558	Q2181308BX_20240125115145__UAE_SA_Phar_08_field_MetaG_S210_R2_001.fastq.gz	81e5781a3c06bdf330b8979dd3d6c99e44d7e816b8bccfd09ff98297df2da0de	1099	20241126T130812_colinlu1	1.44939	1.01475	0.0127064	1.01475	0.0127064	0	0	0	0	1	0.000370989	0	0	0.0378408	0	0	0	0	0	0	coral_field	cnidaria	anthozoa	scleractinia	Poritidae	Porites	harrisoni	24.0852	52.2433	20220530	2025-06-02	0	0	0	0	0	0	0	0	0	0	0
211447	UAE_SA_Phar07_MetaG	Q2181305B9_20240125115145__UAE_SA_Phar_07_field_MetaG_S209_R1_001.fastq.gz	669180c0888167a94b9cbf1607df2e44fd4d1b4e187a6995dc16f47435c171e1	Q2181305B9_20240125115145__UAE_SA_Phar_07_field_MetaG_S209_R2_001.fastq.gz	03eb204d0e1f9916357d59da761431a573e4b10a04ad9aee0af92ac4047416d6	1099	20241126T130812_colinlu1	1.42052	1.02989	0.0124631	1.02989	0.0124631	0	0	0	0	1	0.000397229	0	0	0.0132575	0	0	0	0	0	0	coral_field	cnidaria	anthozoa	scleractinia	Poritidae	Porites	harrisoni	24.0852	52.2433	20220530	2025-06-02	0.0145982	0.000347576	0	0	0	0.000173788	0	0	0	0	0
211449	UAE_SA_Phar09_MetaG	Q2181311BI_20240125115145__UAE_SA_Phar_09_field_MetaG_S211_R1_001.fastq.gz	61139dbc61cf25172156de2c3ac692bc302574384f13690fe390e3cb3fe9d67a	Q2181311BI_20240125115145__UAE_SA_Phar_09_field_MetaG_S211_R2_001.fastq.gz	cee6fd443895eee9e1224c266c764efb53214477436b8b54abb268de3c18ad7b	1099	20241126T130812_colinlu1	1.41249	1.01881	0.0127874	1.01881	0.0127874	0	0	0	0	1	0.000338129	0	0	0.0840096	0	0	0	0	0	0	coral_field	cnidaria	anthozoa	scleractinia	Poritidae	Porites	harrisoni	24.0852	52.2433	20220530	2025-06-02	0	0	0	0	0	0	0	0	0	0	0
211470	UAE_SI_Pdae10_MetaG	Q2181374BG_20240125115147__UAE_SI_Pdae_10_field_MetaG_S232_R1_001.fastq.gz	8fa463e1595c65975ab13fa56129be03891a7357dcdf489950f80f144756a26b	Q2181374BG_20240125115147__UAE_SI_Pdae_10_field_MetaG_S232_R2_001.fastq.gz	bcf15d174ecf5e392a4546a219fbd180c8b84b7a9b26bb971e77f62930277b8c	1099	20241126T130812_colinlu1	1.54038	1.03191	0.0140196	1.03191	0.0140196	0	0	0	0	1	0.000706025	0	0	0.000134481	0.0106576	0	0	0	0	0	coral_field	cnidaria	anthozoa	scleractinia	Merulinidae	Platygyra	daedalea	25.4917	56.3639	20220525	2025-05-02	0.00154653	0	0	0	0	0	0	0	0	0	0
211469	UAE_SI_Pdae09_MetaG	Q2181371BQ_20240125115147__UAE_SI_Pdae_09_field_MetaG_S231_R1_001.fastq.gz	4f2500eccd3da09f9058a7873f082dc3a8664e9506bfb4292ad93b00b811f41a	Q2181371BQ_20240125115147__UAE_SI_Pdae_09_field_MetaG_S231_R2_001.fastq.gz	910e25f2117a47089e7811cc8c06d05e863db05819dd5d6bfa6111859cfc6713	1099	20241126T130812_colinlu1	1.48251	1.02315	0.0142872	1.02315	0.0142872	0	0	0	0	1	0.000560283	0	0	0	0.0219911	0	0	0	0	0	coral_field	cnidaria	anthozoa	scleractinia	Merulinidae	Platygyra	daedalea	25.4917	56.3639	20220525	2025-05-02	0.00091046	0	0	0	0	0	0	0	0	0	0
211468	UAE_SI_Pdae08_MetaG	Q2181368B7_20240125115147__UAE_SI_Pdae_08_field_MetaG_S230_R1_001.fastq.gz	29be759eb6418ad19cf9810f20ab260e1304402a4c4305bbce90b24c3d8980ff	Q2181368B7_20240125115147__UAE_SI_Pdae_08_field_MetaG_S230_R2_001.fastq.gz	df43eb8321d47fa2be8e092d99d8c6683a8f8dbc5136159706ded13863127cae	1099	20241126T130812_colinlu1	1.44336	1.02056	0.0135324	1.02056	0.0135324	0	0	0	0	1	0.000603881	0	0	0.000384288	0.030743	0	0	0	0	0	coral_field	cnidaria	anthozoa	scleractinia	Merulinidae	Platygyra	daedalea	25.4917	56.3639	20220525	2025-05-02	0.00123521	0	0	0	0	0	0	0	0	0	0
211474	UAE_SI_Phar04_MetaG	Q2181386B5_20240125115147__UAE_SI_Phar_04_field_MetaG_S236_R1_001.fastq.gz	c193924fd0037148d645cd2bbbf9bf7733339b95d80033c7e74e32ab1771d862	Q2181386B5_20240125115147__UAE_SI_Phar_04_field_MetaG_S236_R2_001.fastq.gz	161a187dee3ba58a6a22aa92d9553c08be8752479ab5ec9576faf0d0719d23be	1099	20241126T130812_colinlu1	1.47026	1.0202	0.0148328	1.01632	0.0146845	0.0038862	0.000148328	0	0	1	0.000148328	0	0	0	0	0	0	0	0	0	coral_field	cnidaria	anthozoa	scleractinia	Poritidae	Porites	harrisoni	25.4917	56.3639	20220523	2025-05-04	0.000533982	0	0	0	0	0	0	0	0	0	0
211477	UAE_SI_Phar07_MetaG	Q2181395B4_20240125115147__UAE_SI_Phar_07_field_MetaG_S239_R1_001.fastq.gz	9c0fbba65e1e5e1a20feebc4e85ef99fd27bcd5c7e327909a6ef24ab1c0e813a	Q2181395B4_20240125115147__UAE_SI_Phar_07_field_MetaG_S239_R2_001.fastq.gz	f174e47b4bbd79210984f9f3af9301398f790db4dcc301bf844b9b1490a19f3f	1099	20241126T130812_colinlu1	1.46233	1.01632	0.0147552	1.01069	0.0146434	0.00562635	0.000111782	0	0	1	0.000260824	0	0	0	0	0	0	0	0	0	coral_field	cnidaria	anthozoa	scleractinia	Poritidae	Porites	harrisoni	25.4917	56.3639	20220523	2025-04-02	0.000335345	0	0	0	0	0	0	0	0	0	0
211499	UAE_SY_Pdae09_MetaG	Q2181461BP_20240125115149__UAE_SY_Pdae_09_field_MetaG_S261_R1_001.fastq.gz	dcb4b287cdb61e2ecab07b1d6fa5b77d66c82415edc6d4c72d0f62884967727f	Q2181461BP_20240125115149__UAE_SY_Pdae_09_field_MetaG_S261_R2_001.fastq.gz	d3c8678404b4d3629c70808ba30768d8dbeafaea52efb574892291ebac7bb604	1099	20241126T130812_colinlu1	1.42405	1.02114	0.010098	1.0073	0.00992965	0.0138342	0.000168299	0	0	1	0.000437578	0	0	0.0126561	0	0	0	0	0	0	coral_field	cnidaria	anthozoa	scleractinia	Merulinidae	Platygyra	daedalea	24.5995	54.4227	20220518	2025-07-02	0	0	0	0	0	0	0	0	0	0	0
211485	UAE_SY_Cmic05_MetaG	Q2181419BK_20240125115148__UAE_SY_Cmic_05_field_MetaG_S247_R1_001.fastq.gz	74f8dc26548d64063bc8fe6558731de2e2e6217cc6369945c93e4868896030cf	Q2181419BK_20240125115148__UAE_SY_Cmic_05_field_MetaG_S247_R2_001.fastq.gz	a8ec988635327385ffc6182e8ec2de3adf57748cd41f5822e9fb9cdec05014bc	1099	20241126T130812_colinlu1	1.38366	1.01591	0.0131174	1.01591	0.0131174	0	0	0	0	1	0.00049887	0.00196614	0	0	0	0	0	0	0	0	coral_field	cnidaria	anthozoa	scleractinia	Merulinidae	Cyphastrea	microphthalma	24.5995	54.4227	20220520	2025-06-05	0.138216	0.00193679	0	0	0	0.00120316	0	0.00126185	0.000616251	0	0
211496	UAE_SY_Pdae06_MetaG	Q2181028EM_20241105163934__UAE_SY_Pdae_06_field_MetaG_S144_R1_001.fastq.gz	6e49b5638f7f403551a2166db41b2ecc7553eee7e18968524c724a7c4e1bae59	Q2181028EM_20241105163934__UAE_SY_Pdae_06_field_MetaG_S144_R2_001.fastq.gz	1fe10394d6e189f4ec3711f09e3d9426738840bec2c9f87c1756e70ce05800a8	1099	20241126T130812_colinlu1	1.32104	1.03534	0.0120224	1.02018	0.0118708	0.0151607	0.000151607	0	0	1	0.000242571	0	0	0	0	0	0	0	0	0	coral_field	cnidaria	anthozoa	scleractinia	Merulinidae	Platygyra	daedalea	24.5995	54.4227	20220518	2025-07-02	0	0	0	0	0	0	0	0	0	0	0
211467	UAE_SI_Pdae07_MetaG	Q2181365BH_20240125115147__UAE_SI_Pdae_07_field_MetaG_S229_R1_001.fastq.gz	f46cc94cc75f8f3a39a35f51f6381a61c9577df5bd6060817d641833daa6ca69	Q2181365BH_20240125115147__UAE_SI_Pdae_07_field_MetaG_S229_R2_001.fastq.gz	d76fc510997c2316b9577c38f49b740137f6b01dcb935d39a7b6baeb7b04fc62	1099	20241126T130812_colinlu1	1.49548	1.03099	0.0105063	1.03099	0.0105063	0	0	0	0	1	0.000838741	0	0	0.00662164	0.0894804	0	0	0	0	0	coral_field	cnidaria	anthozoa	scleractinia	Merulinidae	Platygyra	daedalea	25.4917	56.3639	20220525	2025-05-02	0.00569461	0	0	0	0	0	0	0	0	0	0
211462	UAE_SI_Pdae02_MetaG	Q2181350B4_20240125115146__UAE_SI_Pdae_02_field_MetaG_S224_R1_001.fastq.gz	0833f461ebf441d402b3e4bc2d3d83479df90a7536378d220e87de274e088e5b	Q2181350B4_20240125115146__UAE_SI_Pdae_02_field_MetaG_S224_R2_001.fastq.gz	0f74c18212b6ee725859fec6a8b4c6125f08b66f1c5ee1e6ab4e5d206e620740	1099	20241126T130812_colinlu1	1.43311	1.02089	0.0140505	1.01989	0.01397	0.00100648	8.05185e-05	0	0	1	0.000845445	0	0	0.00104674	0.00982326	0	0	0	0	0	coral_field	cnidaria	anthozoa	scleractinia	Merulinidae	Platygyra	daedalea	25.4917	56.3639	20220525	2025-05-02	0.0271347	0	0	0	0	0	0	0	0	0	0
211508	UAE_SY_Phar08_MetaG	Q2181488BR_20240125115150__UAE_SY_Phar_08_field_MetaG_S270_R1_001.fastq.gz	51b0a3c23e27177418f7dc43ae0ed4e9eafb7c946ac579c239177234c25e4606	Q2181488BR_20240125115150__UAE_SY_Phar_08_field_MetaG_S270_R2_001.fastq.gz	ca408c3358c4a7d04e22c97712d69869b62606a493fc570d888b94d3aaaf457a	1099	20241126T130812_colinlu1	1.39827	1.02037	0.0127762	1.02037	0.0127762	0	0	0	0	1	0.000339943	0	0	0.0906232	0	0	0	0	0	0	coral_field	cnidaria	anthozoa	scleractinia	Poritidae	Porites	harrisoni	24.5995	54.4227	20220516	2025-07-02	0	0	0	0	0	0	0	0	0	0	0
211495	UAE_SY_Pdae05_MetaG	Q2181449B7_20240125115149__UAE_SY_Pdae_05_field_MetaG_S257_R1_001.fastq.gz	84c5a33c7a78196b66c6a8ff853d1721e08ab1d2dd49f4eedba8b4224f622fb7	Q2181449B7_20240125115149__UAE_SY_Pdae_05_field_MetaG_S257_R2_001.fastq.gz	8c9632016c5983d1d889c49bdf27663f373fda5cd07c5618fef24998c7ffab8b	1099	20241126T130812_colinlu1	1.4096	1.02855	0.00999659	1.01497	0.0098726	0.0135768	0.000123989	0	0	1	0.000371966	0.000356468	0	0.0356003	0	0	0	0	0	0	coral_field	cnidaria	anthozoa	scleractinia	Merulinidae	Platygyra	daedalea	24.5995	54.4227	20220518	2025-07-02	0.000898918	0	0.000480456	0	0	0	0	0	0	0	0
211478	UAE_SI_Phar08_MetaG	Q2181398BS_20240125115147__UAE_SI_Phar_08_field_MetaG_S240_R1_001.fastq.gz	05b2fb5bc24452d8d7f77f530443b6082d77fd00a06af3fcb0e4cd075db9e6df	Q2181398BS_20240125115147__UAE_SI_Phar_08_field_MetaG_S240_R2_001.fastq.gz	1c362bde36d636f2423a7d412c463d92b5f96a3fefa7420509dc84698f301bbc	1099	20241126T130812_colinlu1	1.40164	1.01741	0.0141791	1.01741	0.0141791	0	0	0	0	1	0.000538445	0	0	0.0206404	0.000358963	0	0	0	0	0.000430756	coral_field	cnidaria	anthozoa	scleractinia	Poritidae	Porites	harrisoni	25.4917	56.3639	20220523	2025-04-02	0.0142508	0	0	0	0	0	0	0	0	0	0
211480	UAE_SI_Phar10_MetaG	Q2181404B7_20240125115148__UAE_SI_Phar_10_field_MetaG_S242_R1_001.fastq.gz	b8b62427cf48763e8b76fe7d4817eceb50944eec8ac8b3c102b13852a6142963	Q2181404B7_20240125115148__UAE_SI_Phar_10_field_MetaG_S242_R2_001.fastq.gz	23a035882836776d9e33337820cbcb56b132dcd4a04cb7c558965ef53d32838d	1099	20241126T130812_colinlu1	1.34366	1.00891	0.0122124	1.00883	0.0121851	0	0	8.17795e-05	2.72598e-05	1	0.000163559	0	0	0	0	0	0	0	0	0	coral_field	cnidaria	anthozoa	scleractinia	Poritidae	Porites	harrisoni	25.4917	56.3639	20220523	2025-04-02	0.00218079	0	0	0	0	0	0	0	0	0	0
seq_accession																																							883	968	1441	4521	3293003	976	23335	65422	1888	914	54328
540_20241128T075405_DBV_20241130T041509.seqs.relative.abund_and_meta
[truncated: 214 more columns]
