# Supplementary material for: Summer temperature maxima already challenge thermal capacities of coral in the Southern Persian/Arabian Gulf
Source: Research Square preprint supplement (doi:10.21203/rs.3.rs-8231598/v1), 2025-12-04
Supplement: Supplementary file 2 [file 27bcfbbecf6b2a14347b8108.xlsx]

## Sheet: Timepoint1
Sample_ID	PAM
20220516_UAE_SY_Cmic_01_42.9_420	0
20220516_UAE_SY_Cmic_02_42.9_420	0
20220516_UAE_SY_Cmic_03_42.9_420	0
20220516_UAE_SY_Cmic_04_42.9_420	0.004
20220516_UAE_SY_Cmic_05_42.9_420	0
20220516_UAE_SY_Cmic_06_42.9_420	0
20220516_UAE_SY_Cmic_07_42.9_420	0
20220516_UAE_SY_Cmic_08_42.9_420	0.005
20220516_UAE_SY_Cmic_09_42.9_420	0.011
20220516_UAE_SY_Cmic_10_42.9_420	0
20220516_UAE_SY_Cmic_01_39.9_420	0.047
20220516_UAE_SY_Cmic_02_39.9_420	0.048
20220516_UAE_SY_Cmic_03_39.9_420	0.106
20220516_UAE_SY_Cmic_04_39.9_420	0.053
20220516_UAE_SY_Cmic_05_39.9_420	0.024
20220516_UAE_SY_Cmic_06_39.9_420	0.062
20220516_UAE_SY_Cmic_07_39.9_420	0.038
20220516_UAE_SY_Cmic_08_39.9_420	0.051
20220516_UAE_SY_Cmic_09_39.9_420	0.065
20220516_UAE_SY_Cmic_10_39.9_420	0.03
20220516_UAE_SY_Cmic_01_37.9_420	0.212
20220516_UAE_SY_Cmic_02_37.9_420	0.332
20220516_UAE_SY_Cmic_03_37.9_420	0.292
20220516_UAE_SY_Cmic_04_37.9_420	0.277
20220516_UAE_SY_Cmic_05_37.9_420	0.189
20220516_UAE_SY_Cmic_06_37.9_420	0.197
20220516_UAE_SY_Cmic_07_37.9_420	0.302
20220516_UAE_SY_Cmic_08_37.9_420	0.224
20220516_UAE_SY_Cmic_09_37.9_420	0.25
20220516_UAE_SY_Cmic_10_37.9_420	0.253
20220516_UAE_SY_Cmic_01_33.9_420	0.562
20220516_UAE_SY_Cmic_02_33.9_420	0.578
20220516_UAE_SY_Cmic_03_33.9_420	0.586
20220516_UAE_SY_Cmic_04_33.9_420	0.586
20220516_UAE_SY_Cmic_05_33.9_420	0.565
20220516_UAE_SY_Cmic_06_33.9_420	0.595
20220516_UAE_SY_Cmic_07_33.9_420	0.577
20220516_UAE_SY_Cmic_08_33.9_420	0.602
20220516_UAE_SY_Cmic_09_33.9_420	0.573
20220516_UAE_SY_Cmic_10_33.9_420	0.594
20220518_UAE_SY_Pdae_01_42.9_420	0
20220518_UAE_SY_Pdae_02_42.9_420	0.014
20220518_UAE_SY_Pdae_03_42.9_420	0.003
20220518_UAE_SY_Pdae_04_42.9_420	0.037
20220518_UAE_SY_Pdae_05_42.9_420	0
20220518_UAE_SY_Pdae_06_42.9_420	0
20220518_UAE_SY_Pdae_07_42.9_420	0.003
20220518_UAE_SY_Pdae_08_42.9_420	0
20220518_UAE_SY_Pdae_09_42.9_420	0.004
20220518_UAE_SY_Pdae_10_42.9_420	0.012
20220518_UAE_SY_Pdae_01_39.9_420	0.095
20220518_UAE_SY_Pdae_02_39.9_420	0.036
20220518_UAE_SY_Pdae_03_39.9_420	0.046
20220518_UAE_SY_Pdae_04_39.9_420	0.036
20220518_UAE_SY_Pdae_05_39.9_420	0.016
20220518_UAE_SY_Pdae_06_39.9_420	0.055
20220518_UAE_SY_Pdae_07_39.9_420	0.035
20220518_UAE_SY_Pdae_08_39.9_420	0.033
20220518_UAE_SY_Pdae_09_39.9_420	0.027
20220518_UAE_SY_Pdae_10_39.9_420	0.005
20220518_UAE_SY_Pdae_01_37.9_420	0.242
20220518_UAE_SY_Pdae_02_37.9_420	0.194
20220518_UAE_SY_Pdae_03_37.9_420	0.226
20220518_UAE_SY_Pdae_04_37.9_420	0.227
20220518_UAE_SY_Pdae_05_37.9_420	0.216
20220518_UAE_SY_Pdae_06_37.9_420	0.24
20220518_UAE_SY_Pdae_07_37.9_420	0.229
20220518_UAE_SY_Pdae_08_37.9_420	0.143
20220518_UAE_SY_Pdae_09_37.9_420	0.245
20220518_UAE_SY_Pdae_10_37.9_420	0.257
20220518_UAE_SY_Pdae_01_33.9_420	0.538
20220518_UAE_SY_Pdae_02_33.9_420	0.481
20220518_UAE_SY_Pdae_03_33.9_420	0.532
20220518_UAE_SY_Pdae_04_33.9_420	0.559
20220518_UAE_SY_Pdae_05_33.9_420	0.526
20220518_UAE_SY_Pdae_06_33.9_420	0.495
20220518_UAE_SY_Pdae_07_33.9_420	0.526
20220518_UAE_SY_Pdae_08_33.9_420	0.384
20220518_UAE_SY_Pdae_09_33.9_420	0.54
20220518_UAE_SY_Pdae_10_33.9_420	0.533
20220516_UAE_SY_Phar_01_42.9_420	0
20220516_UAE_SY_Phar_02_42.9_420	0
20220516_UAE_SY_Phar_03_42.9_420	0.01
20220516_UAE_SY_Phar_04_42.9_420	0.012
20220516_UAE_SY_Phar_05_42.9_420	0.049
20220516_UAE_SY_Phar_06_42.9_420	0.015
20220516_UAE_SY_Phar_07_42.9_420	0.025
20220516_UAE_SY_Phar_08_42.9_420	0
20220516_UAE_SY_Phar_09_42.9_420	0.011
20220516_UAE_SY_Phar_10_42.9_420	0.006
20220516_UAE_SY_Phar_01_39.9_420	0
20220516_UAE_SY_Phar_02_39.9_420	0.049
20220516_UAE_SY_Phar_03_39.9_420	0
20220516_UAE_SY_Phar_04_39.9_420	0.062
20220516_UAE_SY_Phar_05_39.9_420	0
20220516_UAE_SY_Phar_06_39.9_420	0.031
20220516_UAE_SY_Phar_07_39.9_420	0
20220516_UAE_SY_Phar_08_39.9_420	0.041
20220516_UAE_SY_Phar_09_39.9_420	0
20220516_UAE_SY_Phar_10_39.9_420	0.031
20220516_UAE_SY_Phar_01_37.9_420	0.243
20220516_UAE_SY_Phar_02_37.9_420	0.254
20220516_UAE_SY_Phar_03_37.9_420	0.403
20220516_UAE_SY_Phar_04_37.9_420	0.194
20220516_UAE_SY_Phar_05_37.9_420	0.455
20220516_UAE_SY_Phar_06_37.9_420	0.299
20220516_UAE_SY_Phar_07_37.9_420	0.253
20220516_UAE_SY_Phar_08_37.9_420	0.396
20220516_UAE_SY_Phar_09_37.9_420	0.373
20220516_UAE_SY_Phar_10_37.9_420	0.358
20220516_UAE_SY_Phar_01_33.9_420	0.43
20220516_UAE_SY_Phar_02_33.9_420	0.469
20220516_UAE_SY_Phar_03_33.9_420	0.541
20220516_UAE_SY_Phar_04_33.9_420	0.571
20220516_UAE_SY_Phar_05_33.9_420	0.528
20220516_UAE_SY_Phar_06_33.9_420	0.444
20220516_UAE_SY_Phar_07_33.9_420	0.51
20220516_UAE_SY_Phar_08_33.9_420	0.529
20220516_UAE_SY_Phar_09_33.9_420	0.522
20220516_UAE_SY_Phar_10_33.9_420	0.51
20220525_UAE_AA_Cmic_01_41.6_420	0
20220525_UAE_AA_Cmic_02_41.6_420	0.004
20220525_UAE_AA_Cmic_03_41.6_420	0
20220525_UAE_AA_Cmic_04_41.6_420	0
20220525_UAE_AA_Cmic_05_41.6_420	0.009
20220525_UAE_AA_Cmic_06_41.6_420	0.009
20220525_UAE_AA_Cmic_07_41.6_420	0
20220525_UAE_AA_Cmic_08_41.6_420	0
20220525_UAE_AA_Cmic_09_41.6_420	0.01
20220525_UAE_AA_Cmic_10_41.6_420	0.016
20220525_UAE_AA_Cmic_01_38.6_420	0.126
20220525_UAE_AA_Cmic_02_38.6_420	0.215
20220525_UAE_AA_Cmic_03_38.6_420	0.42
20220525_UAE_AA_Cmic_04_38.6_420	0.325
20220525_UAE_AA_Cmic_05_38.6_420	0.366
20220525_UAE_AA_Cmic_06_38.6_420	0.166
20220525_UAE_AA_Cmic_07_38.6_420	0.152
20220525_UAE_AA_Cmic_08_38.6_420	0.309
20220525_UAE_AA_Cmic_09_38.6_420	0.179
20220525_UAE_AA_Cmic_10_38.6_420	0.137
20220525_UAE_AA_Cmic_01_36.6_420	0.554
20220525_UAE_AA_Cmic_02_36.6_420	0.45
20220525_UAE_AA_Cmic_03_36.6_420	0.569
20220525_UAE_AA_Cmic_04_36.6_420	0.613
20220525_UAE_AA_Cmic_05_36.6_420	0.548
20220525_UAE_AA_Cmic_06_36.6_420	0.536
20220525_UAE_AA_Cmic_07_36.6_420	0.549
20220525_UAE_AA_Cmic_08_36.6_420	0.59
20220525_UAE_AA_Cmic_09_36.6_420	0.557
20220525_UAE_AA_Cmic_10_36.6_420	0.446
20220525_UAE_AA_Cmic_01_32.6_420	0.644
20220525_UAE_AA_Cmic_02_32.6_420	0.607
20220525_UAE_AA_Cmic_03_32.6_420	0.631
20220525_UAE_AA_Cmic_04_32.6_420	0.631
20220525_UAE_AA_Cmic_05_32.6_420	0.626
20220525_UAE_AA_Cmic_06_32.6_420	0.637
20220525_UAE_AA_Cmic_07_32.6_420	0.616
20220525_UAE_AA_Cmic_08_32.6_420	0.648
20220525_UAE_AA_Cmic_09_32.6_420	0.625
20220525_UAE_AA_Cmic_10_32.6_420	0.591
20220525_UAE_AA_Pdae_01_41.6_420	0.006
20220525_UAE_AA_Pdae_02_41.6_420	0.004
20220525_UAE_AA_Pdae_03_41.6_420	0.006
20220525_UAE_AA_Pdae_04_41.6_420	0.006
20220525_UAE_AA_Pdae_05_41.6_420	0.015
20220525_UAE_AA_Pdae_06_41.6_420	0.014
20220525_UAE_AA_Pdae_07_41.6_420	0.008
20220525_UAE_AA_Pdae_08_41.6_420	0.015
20220525_UAE_AA_Pdae_09_41.6_420	0.007
20220525_UAE_AA_Pdae_10_41.6_420	0.007
20220525_UAE_AA_Pdae_01_38.6_420	0.314
20220525_UAE_AA_Pdae_02_38.6_420	0.228
20220525_UAE_AA_Pdae_03_38.6_420	0.24
20220525_UAE_AA_Pdae_04_38.6_420	0.214
20220525_UAE_AA_Pdae_05_38.6_420	0.32
20220525_UAE_AA_Pdae_06_38.6_420	0.406
20220525_UAE_AA_Pdae_07_38.6_420	0.224
20220525_UAE_AA_Pdae_08_38.6_420	0.417
20220525_UAE_AA_Pdae_09_38.6_420	0.329
20220525_UAE_AA_Pdae_10_38.6_420	0.396
20220525_UAE_AA_Pdae_01_36.6_420	0.517
20220525_UAE_AA_Pdae_02_36.6_420	0.528
20220525_UAE_AA_Pdae_03_36.6_420	0.509
20220525_UAE_AA_Pdae_04_36.6_420	0.513
20220525_UAE_AA_Pdae_05_36.6_420	0.506
20220525_UAE_AA_Pdae_06_36.6_420	0.596
20220525_UAE_AA_Pdae_07_36.6_420	0.538
20220525_UAE_AA_Pdae_08_36.6_420	0.608
20220525_UAE_AA_Pdae_09_36.6_420	0.534
20220525_UAE_AA_Pdae_10_36.6_420	0.603
20220525_UAE_AA_Pdae_01_32.6_420	0.622
20220525_UAE_AA_Pdae_02_32.6_420	0.605
20220525_UAE_AA_Pdae_03_32.6_420	0.613
20220525_UAE_AA_Pdae_04_32.6_420	0.608
20220525_UAE_AA_Pdae_05_32.6_420	0.629
20220525_UAE_AA_Pdae_06_32.6_420	0.631
20220525_UAE_AA_Pdae_07_32.6_420	0.599
20220525_UAE_AA_Pdae_08_32.6_420	0.648
20220525_UAE_AA_Pdae_09_32.6_420	0.629
20220525_UAE_AA_Pdae_10_32.6_420	0.645
20220523_UAE_AA_Phar_01_41.6_420	0
20220523_UAE_AA_Phar_02_41.6_420	0.004
20220523_UAE_AA_Phar_03_41.6_420	0.019
20220523_UAE_AA_Phar_04_41.6_420	0
20220523_UAE_AA_Phar_05_41.6_420	0
20220523_UAE_AA_Phar_06_41.6_420	0.021
20220523_UAE_AA_Phar_07_41.6_420	0.021
20220523_UAE_AA_Phar_08_41.6_420	0.002
20220523_UAE_AA_Phar_09_41.6_420	0.006
20220523_UAE_AA_Phar_10_41.6_420	0
20220523_UAE_AA_Phar_01_38.6_420	0.282
20220523_UAE_AA_Phar_02_38.6_420	0.39
20220523_UAE_AA_Phar_03_38.6_420	0.339
20220523_UAE_AA_Phar_04_38.6_420	0.259
20220523_UAE_AA_Phar_05_38.6_420	0.436
20220523_UAE_AA_Phar_06_38.6_420	0.107
20220523_UAE_AA_Phar_07_38.6_420	0.376
20220523_UAE_AA_Phar_08_38.6_420	0.264
20220523_UAE_AA_Phar_09_38.6_420	0.3
20220523_UAE_AA_Phar_10_38.6_420	0.091
20220523_UAE_AA_Phar_01_36.6_420	0.545
20220523_UAE_AA_Phar_02_36.6_420	0.498
20220523_UAE_AA_Phar_03_36.6_420	0.555
20220523_UAE_AA_Phar_04_36.6_420	0.482
20220523_UAE_AA_Phar_05_36.6_420	0.589
20220523_UAE_AA_Phar_06_36.6_420	0.31
20220523_UAE_AA_Phar_07_36.6_420	0.578
20220523_UAE_AA_Phar_08_36.6_420	0.458
20220523_UAE_AA_Phar_09_36.6_420	0.518
20220523_UAE_AA_Phar_10_36.6_420	0.488
20220523_UAE_AA_Phar_01_32.6_420	0.589
20220523_UAE_AA_Phar_02_32.6_420	0.619
20220523_UAE_AA_Phar_03_32.6_420	0.604
20220523_UAE_AA_Phar_04_32.6_420	0.552
20220523_UAE_AA_Phar_05_32.6_420	0.614
20220523_UAE_AA_Phar_06_32.6_420	0.551
20220523_UAE_AA_Phar_07_32.6_420	0.603
20220523_UAE_AA_Phar_08_32.6_420	0.563
20220523_UAE_AA_Phar_09_32.6_420	0.601
20220523_UAE_AA_Phar_10_32.6_420	0.593
20220601_UAE_SA_Cmic_01_43.1_420	0.009
20220601_UAE_SA_Cmic_02_43.1_420	0
20220601_UAE_SA_Cmic_03_43.1_420	0.013
20220601_UAE_SA_Cmic_04_43.1_420	0.009
20220601_UAE_SA_Cmic_05_43.1_420	0.003
20220601_UAE_SA_Cmic_06_43.1_420	0
20220601_UAE_SA_Cmic_07_43.1_420	0
20220601_UAE_SA_Cmic_08_43.1_420	0.004
20220601_UAE_SA_Cmic_09_43.1_420	0.024
20220601_UAE_SA_Cmic_10_43.1_420	0.012
20220601_UAE_SA_Cmic_01_40.1_420	0.053
20220601_UAE_SA_Cmic_02_40.1_420	0.082
20220601_UAE_SA_Cmic_03_40.1_420	0.073
20220601_UAE_SA_Cmic_04_40.1_420	0.043
20220601_UAE_SA_Cmic_05_40.1_420	0.061
20220601_UAE_SA_Cmic_06_40.1_420	0.021
20220601_UAE_SA_Cmic_07_40.1_420	0.035
20220601_UAE_SA_Cmic_08_40.1_420	0.003
20220601_UAE_SA_Cmic_09_40.1_420	0.005
20220601_UAE_SA_Cmic_10_40.1_420	0.048
20220601_UAE_SA_Cmic_01_38.1_420	0.223
20220601_UAE_SA_Cmic_02_38.1_420	0.192
20220601_UAE_SA_Cmic_03_38.1_420	0.354
20220601_UAE_SA_Cmic_04_38.1_420	0.19
20220601_UAE_SA_Cmic_05_38.1_420	0.35
20220601_UAE_SA_Cmic_06_38.1_420	0.202
20220601_UAE_SA_Cmic_07_38.1_420	0.268
20220601_UAE_SA_Cmic_08_38.1_420	0.222
20220601_UAE_SA_Cmic_09_38.1_420	0.305
20220601_UAE_SA_Cmic_10_38.1_420	0.357
20220601_UAE_SA_Cmic_01_34.1_420	0.593
20220601_UAE_SA_Cmic_02_34.1_420	0.56
20220601_UAE_SA_Cmic_03_34.1_420	0.615
20220601_UAE_SA_Cmic_04_34.1_420	0.545
20220601_UAE_SA_Cmic_05_34.1_420	0.591
20220601_UAE_SA_Cmic_06_34.1_420	0.576
20220601_UAE_SA_Cmic_07_34.1_420	0.575
20220601_UAE_SA_Cmic_08_34.1_420	0.573
20220601_UAE_SA_Cmic_09_34.1_420	0.623
20220601_UAE_SA_Cmic_10_34.1_420	0.579
20220530_UAE_SA_Phar_01_43.1_420	0.009
20220530_UAE_SA_Phar_02_43.1_420	0
20220530_UAE_SA_Phar_03_43.1_420	0
20220530_UAE_SA_Phar_04_43.1_420	0
20220530_UAE_SA_Phar_05_43.1_420	0.005
20220530_UAE_SA_Phar_06_43.1_420	0.005
20220530_UAE_SA_Phar_07_43.1_420	0
20220530_UAE_SA_Phar_08_43.1_420	0.022
20220530_UAE_SA_Phar_09_43.1_420	0
20220530_UAE_SA_Phar_10_43.1_420	0.014
20220530_UAE_SA_Phar_01_40.1_420	0.174
20220530_UAE_SA_Phar_02_40.1_420	0.04
20220530_UAE_SA_Phar_03_40.1_420	0.023
20220530_UAE_SA_Phar_04_40.1_420	0.09
20220530_UAE_SA_Phar_05_40.1_420	0.092
20220530_UAE_SA_Phar_06_40.1_420	0.036
20220530_UAE_SA_Phar_07_40.1_420	0.088
20220530_UAE_SA_Phar_08_40.1_420	0.058
20220530_UAE_SA_Phar_09_40.1_420	0.163
20220530_UAE_SA_Phar_10_40.1_420	0.007
20220530_UAE_SA_Phar_01_38.1_420	0.369
20220530_UAE_SA_Phar_02_38.1_420	0.452
20220530_UAE_SA_Phar_03_38.1_420	0.47
20220530_UAE_SA_Phar_04_38.1_420	0.434
20220530_UAE_SA_Phar_05_38.1_420	0.429
20220530_UAE_SA_Phar_06_38.1_420	0.407
20220530_UAE_SA_Phar_07_38.1_420	0.376
20220530_UAE_SA_Phar_08_38.1_420	0.464
20220530_UAE_SA_Phar_09_38.1_420	0.327
20220530_UAE_SA_Phar_10_38.1_420	0.31
20220530_UAE_SA_Phar_01_34.1_420	0.6
20220530_UAE_SA_Phar_02_34.1_420	0.616
20220530_UAE_SA_Phar_03_34.1_420	0.578
20220530_UAE_SA_Phar_04_34.1_420	0.585
20220530_UAE_SA_Phar_05_34.1_420	0.615
20220530_UAE_SA_Phar_06_34.1_420	0.581
20220530_UAE_SA_Phar_07_34.1_420	0.622
20220530_UAE_SA_Phar_08_34.1_420	0.593
20220530_UAE_SA_Phar_09_34.1_420	0.6
20220530_UAE_SA_Phar_10_34.1_420	0.584

## Sheet: Timepoint2
Sample_ID	PAM
20220601_UAE_SA_Cmic_01_43.1_1050	0.008
20220601_UAE_SA_Cmic_02_43.1_1050	0.004
20220601_UAE_SA_Cmic_03_43.1_1050	0.012
20220601_UAE_SA_Cmic_04_43.1_1050	0.014
20220601_UAE_SA_Cmic_05_43.1_1050	0.003
20220601_UAE_SA_Cmic_06_43.1_1050	0.006
20220601_UAE_SA_Cmic_07_43.1_1050	0
20220601_UAE_SA_Cmic_08_43.1_1050	0.011
20220601_UAE_SA_Cmic_09_43.1_1050	0.016
20220601_UAE_SA_Cmic_10_43.1_1050	0.025
20220601_UAE_SA_Cmic_01_40.1_1050	0.009
20220601_UAE_SA_Cmic_02_40.1_1050	0.013
20220601_UAE_SA_Cmic_03_40.1_1050	0.057
20220601_UAE_SA_Cmic_04_40.1_1050	0.006
20220601_UAE_SA_Cmic_05_40.1_1050	0.018
20220601_UAE_SA_Cmic_06_40.1_1050	0.009
20220601_UAE_SA_Cmic_07_40.1_1050	0
20220601_UAE_SA_Cmic_08_40.1_1050	0.006
20220601_UAE_SA_Cmic_09_40.1_1050	0.011
20220601_UAE_SA_Cmic_10_40.1_1050	0
20220601_UAE_SA_Cmic_01_38.1_1050	0.081
20220601_UAE_SA_Cmic_02_38.1_1050	0.049
20220601_UAE_SA_Cmic_03_38.1_1050	0.276
20220601_UAE_SA_Cmic_04_38.1_1050	0
20220601_UAE_SA_Cmic_05_38.1_1050	0
20220601_UAE_SA_Cmic_06_38.1_1050	0.079
20220601_UAE_SA_Cmic_07_38.1_1050	0
20220601_UAE_SA_Cmic_08_38.1_1050	0.036
20220601_UAE_SA_Cmic_09_38.1_1050	0.156
20220601_UAE_SA_Cmic_10_38.1_1050	0
20220601_UAE_SA_Cmic_01_34.1_1050	0.573
20220601_UAE_SA_Cmic_02_34.1_1050	0.544
20220601_UAE_SA_Cmic_03_34.1_1050	0.603
20220601_UAE_SA_Cmic_04_34.1_1050	0.564
20220601_UAE_SA_Cmic_05_34.1_1050	0.616
20220601_UAE_SA_Cmic_06_34.1_1050	0.591
20220601_UAE_SA_Cmic_07_34.1_1050	0.581
20220601_UAE_SA_Cmic_08_34.1_1050	0.586
20220601_UAE_SA_Cmic_09_34.1_1050	0.601
20220601_UAE_SA_Cmic_10_34.1_1050	0.56
20220531_UAE_SA_Phar_01_43.1_1050	0.007
20220531_UAE_SA_Phar_02_43.1_1050	0.024
20220531_UAE_SA_Phar_03_43.1_1050	0.009
20220531_UAE_SA_Phar_04_43.1_1050	0.016
20220531_UAE_SA_Phar_05_43.1_1050	0.005
20220531_UAE_SA_Phar_06_43.1_1050	0.012
20220531_UAE_SA_Phar_07_43.1_1050	0.005
20220531_UAE_SA_Phar_08_43.1_1050	0.027
20220531_UAE_SA_Phar_09_43.1_1050	0.003
20220531_UAE_SA_Phar_10_43.1_1050	0.012
20220531_UAE_SA_Phar_01_40.1_1050	0.017
20220531_UAE_SA_Phar_02_40.1_1050	0.067
20220531_UAE_SA_Phar_03_40.1_1050	0.038
20220531_UAE_SA_Phar_04_40.1_1050	0.039
20220531_UAE_SA_Phar_05_40.1_1050	0.084
20220531_UAE_SA_Phar_06_40.1_1050	0.018
20220531_UAE_SA_Phar_07_40.1_1050	0.03
20220531_UAE_SA_Phar_08_40.1_1050	0.016
20220531_UAE_SA_Phar_09_40.1_1050	0.102
20220531_UAE_SA_Phar_10_40.1_1050	0
20220531_UAE_SA_Phar_01_38.1_1050	0.278
20220531_UAE_SA_Phar_02_38.1_1050	0.265
20220531_UAE_SA_Phar_03_38.1_1050	0.42
20220531_UAE_SA_Phar_04_38.1_1050	0.302
20220531_UAE_SA_Phar_05_38.1_1050	0.382
20220531_UAE_SA_Phar_06_38.1_1050	0.405
20220531_UAE_SA_Phar_07_38.1_1050	0.272
20220531_UAE_SA_Phar_08_38.1_1050	0.42
20220531_UAE_SA_Phar_09_38.1_1050	0.13
20220531_UAE_SA_Phar_10_38.1_1050	0.219
20220531_UAE_SA_Phar_01_34.1_1050	0.602
20220531_UAE_SA_Phar_02_34.1_1050	0.584
20220531_UAE_SA_Phar_03_34.1_1050	0.567
20220531_UAE_SA_Phar_04_34.1_1050	0.594
20220531_UAE_SA_Phar_05_34.1_1050	0.604
20220531_UAE_SA_Phar_06_34.1_1050	0.58
20220531_UAE_SA_Phar_07_34.1_1050	0.601
20220531_UAE_SA_Phar_08_34.1_1050	0.584
20220531_UAE_SA_Phar_09_34.1_1050	0.602
20220531_UAE_SA_Phar_10_34.1_1050	0.588
20220516_UAE_SY_Cmic_01_42.9_1050	0
20220516_UAE_SY_Cmic_02_42.9_1050	0.005
20220516_UAE_SY_Cmic_03_42.9_1050	0
20220516_UAE_SY_Cmic_04_42.9_1050	0
20220516_UAE_SY_Cmic_05_42.9_1050	0.003
20220516_UAE_SY_Cmic_06_42.9_1050	0.006
20220516_UAE_SY_Cmic_07_42.9_1050	0
20220516_UAE_SY_Cmic_08_42.9_1050	0.004
20220516_UAE_SY_Cmic_09_42.9_1050	0.005
20220516_UAE_SY_Cmic_10_42.9_1050	0
20220516_UAE_SY_Cmic_01_39.9_1050	0.012
20220516_UAE_SY_Cmic_02_39.9_1050	0.002
20220516_UAE_SY_Cmic_03_39.9_1050	0.011
20220516_UAE_SY_Cmic_04_39.9_1050	0.044
20220516_UAE_SY_Cmic_05_39.9_1050	0.002
20220516_UAE_SY_Cmic_06_39.9_1050	0.002
20220516_UAE_SY_Cmic_07_39.9_1050	0.007
20220516_UAE_SY_Cmic_08_39.9_1050	0.004
20220516_UAE_SY_Cmic_09_39.9_1050	0.004
20220516_UAE_SY_Cmic_10_39.9_1050	0.002
20220516_UAE_SY_Cmic_01_37.9_1050	0.069
20220516_UAE_SY_Cmic_02_37.9_1050	0.1
20220516_UAE_SY_Cmic_03_37.9_1050	0.262
20220516_UAE_SY_Cmic_04_37.9_1050	0.146
20220516_UAE_SY_Cmic_05_37.9_1050	0.132
20220516_UAE_SY_Cmic_06_37.9_1050	0
20220516_UAE_SY_Cmic_07_37.9_1050	0.209
20220516_UAE_SY_Cmic_08_37.9_1050	0.177
20220516_UAE_SY_Cmic_09_37.9_1050	0.021
20220516_UAE_SY_Cmic_10_37.9_1050	0.019
20220516_UAE_SY_Cmic_01_33.9_1050	0.55
20220516_UAE_SY_Cmic_02_33.9_1050	0.581
20220516_UAE_SY_Cmic_03_33.9_1050	0.59
20220516_UAE_SY_Cmic_04_33.9_1050	0.575
20220516_UAE_SY_Cmic_05_33.9_1050	0.585
20220516_UAE_SY_Cmic_06_33.9_1050	0.573
20220516_UAE_SY_Cmic_07_33.9_1050	0.595
20220516_UAE_SY_Cmic_08_33.9_1050	0.609
20220516_UAE_SY_Cmic_09_33.9_1050	0.582
20220516_UAE_SY_Cmic_10_33.9_1050	0.589
20220516_UAE_SY_Pdae_01_42.9_1050	0.003
20220516_UAE_SY_Pdae_02_42.9_1050	0.007
20220516_UAE_SY_Pdae_03_42.9_1050	0.003
20220516_UAE_SY_Pdae_04_42.9_1050	0.006
20220516_UAE_SY_Pdae_05_42.9_1050	0.003
20220516_UAE_SY_Pdae_06_42.9_1050	0.007
20220516_UAE_SY_Pdae_07_42.9_1050	0.009
20220516_UAE_SY_Pdae_08_42.9_1050	0.004
20220516_UAE_SY_Pdae_09_42.9_1050	0.006
20220516_UAE_SY_Pdae_10_42.9_1050	0.003
20220516_UAE_SY_Pdae_01_39.9_1050	0.069
20220516_UAE_SY_Pdae_02_39.9_1050	0.013
20220516_UAE_SY_Pdae_03_39.9_1050	0.024
20220516_UAE_SY_Pdae_04_39.9_1050	0.014
20220516_UAE_SY_Pdae_05_39.9_1050	0.025
20220516_UAE_SY_Pdae_06_39.9_1050	0.017
20220516_UAE_SY_Pdae_07_39.9_1050	0.036
20220516_UAE_SY_Pdae_08_39.9_1050	0
20220516_UAE_SY_Pdae_09_39.9_1050	0.017
20220516_UAE_SY_Pdae_10_39.9_1050	0.013
20220516_UAE_SY_Pdae_01_37.9_1050	0.293
20220516_UAE_SY_Pdae_02_37.9_1050	0
20220516_UAE_SY_Pdae_03_37.9_1050	0.21
20220516_UAE_SY_Pdae_04_37.9_1050	0.023
20220516_UAE_SY_Pdae_05_37.9_1050	0.255
20220516_UAE_SY_Pdae_06_37.9_1050	0.16
20220516_UAE_SY_Pdae_07_37.9_1050	0.229
20220516_UAE_SY_Pdae_08_37.9_1050	0.133
20220516_UAE_SY_Pdae_09_37.9_1050	0.253
20220516_UAE_SY_Pdae_10_37.9_1050	0.243
20220516_UAE_SY_Pdae_01_33.9_1050	0.567
20220516_UAE_SY_Pdae_02_33.9_1050	0.504
20220516_UAE_SY_Pdae_03_33.9_1050	0.532
20220516_UAE_SY_Pdae_04_33.9_1050	0.57
20220516_UAE_SY_Pdae_05_33.9_1050	0.535
20220516_UAE_SY_Pdae_06_33.9_1050	0.511
20220516_UAE_SY_Pdae_07_33.9_1050	0.534
20220516_UAE_SY_Pdae_08_33.9_1050	0.391
20220516_UAE_SY_Pdae_09_33.9_1050	0.532
20220516_UAE_SY_Pdae_10_33.9_1050	0.535
20220516_UAE_SY_Phar_01_42.9_1050	0
20220516_UAE_SY_Phar_02_42.9_1050	0.04
20220516_UAE_SY_Phar_03_42.9_1050	0
20220516_UAE_SY_Phar_04_42.9_1050	0.031
20220516_UAE_SY_Phar_05_42.9_1050	0
20220516_UAE_SY_Phar_06_42.9_1050	0.032
20220516_UAE_SY_Phar_07_42.9_1050	0
20220516_UAE_SY_Phar_08_42.9_1050	0.044
20220516_UAE_SY_Phar_09_42.9_1050	0.031
20220516_UAE_SY_Phar_10_42.9_1050	0.051
20220516_UAE_SY_Phar_01_39.9_1050	0.005
20220516_UAE_SY_Phar_02_39.9_1050	0.002
20220516_UAE_SY_Phar_03_39.9_1050	0
20220516_UAE_SY_Phar_04_39.9_1050	0.077
20220516_UAE_SY_Phar_05_39.9_1050	0.012
20220516_UAE_SY_Phar_06_39.9_1050	0.012
20220516_UAE_SY_Phar_07_39.9_1050	0.051
20220516_UAE_SY_Phar_08_39.9_1050	0.058
20220516_UAE_SY_Phar_09_39.9_1050	0.021
20220516_UAE_SY_Phar_10_39.9_1050	0.018
20220516_UAE_SY_Phar_01_37.9_1050	0.235
20220516_UAE_SY_Phar_02_37.9_1050	0.034
20220516_UAE_SY_Phar_03_37.9_1050	0.303
20220516_UAE_SY_Phar_04_37.9_1050	0.228
20220516_UAE_SY_Phar_05_37.9_1050	0.393
20220516_UAE_SY_Phar_06_37.9_1050	0.256
20220516_UAE_SY_Phar_07_37.9_1050	0.297
20220516_UAE_SY_Phar_08_37.9_1050	0.317
20220516_UAE_SY_Phar_09_37.9_1050	0.237
20220516_UAE_SY_Phar_10_37.9_1050	0.338
20220516_UAE_SY_Phar_01_33.9_1050	0.445
20220516_UAE_SY_Phar_02_33.9_1050	0.481
20220516_UAE_SY_Phar_03_33.9_1050	0.526
20220516_UAE_SY_Phar_04_33.9_1050	0.568
20220516_UAE_SY_Phar_05_33.9_1050	0.554
20220516_UAE_SY_Phar_06_33.9_1050	0.441
20220516_UAE_SY_Phar_07_33.9_1050	0.529
20220516_UAE_SY_Phar_08_33.9_1050	0.536
20220516_UAE_SY_Phar_09_33.9_1050	0.542
20220516_UAE_SY_Phar_10_33.9_1050	0.515
20220525_UAE_SI_Cmic_01_41.6_1050	0
20220525_UAE_SI_Cmic_02_41.6_1050	0
20220525_UAE_SI_Cmic_03_41.6_1050	0
20220525_UAE_SI_Cmic_04_41.6_1050	0
20220525_UAE_SI_Cmic_05_41.6_1050	0
20220525_UAE_SI_Cmic_06_41.6_1050	0
20220525_UAE_SI_Cmic_07_41.6_1050	0.017
20220525_UAE_SI_Cmic_08_41.6_1050	0.009
20220525_UAE_SI_Cmic_09_41.6_1050	0
20220525_UAE_SI_Cmic_10_41.6_1050	0.011
20220525_UAE_SI_Cmic_01_38.6_1050	0.029
20220525_UAE_SI_Cmic_02_38.6_1050	0.015
20220525_UAE_SI_Cmic_03_38.6_1050	0
20220525_UAE_SI_Cmic_04_38.6_1050	0.008
20220525_UAE_SI_Cmic_05_38.6_1050	0.005
20220525_UAE_SI_Cmic_06_38.6_1050	0
20220525_UAE_SI_Cmic_07_38.6_1050	0.008
20220525_UAE_SI_Cmic_08_38.6_1050	0
20220525_UAE_SI_Cmic_09_38.6_1050	0
20220525_UAE_SI_Cmic_10_38.6_1050	0.008
20220525_UAE_SI_Cmic_01_36.6_1050	0.154
20220525_UAE_SI_Cmic_02_36.6_1050	0.291
20220525_UAE_SI_Cmic_03_36.6_1050	0.071
20220525_UAE_SI_Cmic_04_36.6_1050	0.333
20220525_UAE_SI_Cmic_05_36.6_1050	0.222
20220525_UAE_SI_Cmic_06_36.6_1050	0.341
20220525_UAE_SI_Cmic_07_36.6_1050	0.421
20220525_UAE_SI_Cmic_08_36.6_1050	0.271
20220525_UAE_SI_Cmic_09_36.6_1050	0.48
20220525_UAE_SI_Cmic_10_36.6_1050	0.135
20220525_UAE_SI_Cmic_01_32.6_1050	0.628
20220525_UAE_SI_Cmic_02_32.6_1050	0.58
20220525_UAE_SI_Cmic_03_32.6_1050	0.618
20220525_UAE_SI_Cmic_04_32.6_1050	0.608
20220525_UAE_SI_Cmic_05_32.6_1050	0.619
20220525_UAE_SI_Cmic_06_32.6_1050	0.642
20220525_UAE_SI_Cmic_07_32.6_1050	0.643
20220525_UAE_SI_Cmic_08_32.6_1050	0.639
20220525_UAE_SI_Cmic_09_32.6_1050	0.637
20220525_UAE_SI_Cmic_10_32.6_1050	0.609
20220525_UAE_SI_Pdae_01_41.6_1050	0.012
20220525_UAE_SI_Pdae_02_41.6_1050	0
20220525_UAE_SI_Pdae_03_41.6_1050	0.011
20220525_UAE_SI_Pdae_04_41.6_1050	0.022
20220525_UAE_SI_Pdae_05_41.6_1050	0.009
20220525_UAE_SI_Pdae_06_41.6_1050	0.008
20220525_UAE_SI_Pdae_07_41.6_1050	0.009
20220525_UAE_SI_Pdae_08_41.6_1050	0.011
20220525_UAE_SI_Pdae_09_41.6_1050	0.007
20220525_UAE_SI_Pdae_10_41.6_1050	0.013
20220525_UAE_SI_Pdae_01_38.6_1050	0.31
20220525_UAE_SI_Pdae_02_38.6_1050	0.17
20220525_UAE_SI_Pdae_03_38.6_1050	0.131
20220525_UAE_SI_Pdae_04_38.6_1050	0.149
20220525_UAE_SI_Pdae_05_38.6_1050	0.266
20220525_UAE_SI_Pdae_06_38.6_1050	0.397
20220525_UAE_SI_Pdae_07_38.6_1050	0.183
20220525_UAE_SI_Pdae_08_38.6_1050	0.356
20220525_UAE_SI_Pdae_09_38.6_1050	0.008
20220525_UAE_SI_Pdae_10_38.6_1050	0.315
20220525_UAE_SI_Pdae_01_36.6_1050	0.518
20220525_UAE_SI_Pdae_02_36.6_1050	0.542
20220525_UAE_SI_Pdae_03_36.6_1050	0.53
20220525_UAE_SI_Pdae_04_36.6_1050	0.509
20220525_UAE_SI_Pdae_05_36.6_1050	0.467
20220525_UAE_SI_Pdae_06_36.6_1050	0.594
20220525_UAE_SI_Pdae_07_36.6_1050	0.56
20220525_UAE_SI_Pdae_08_36.6_1050	0.581
20220525_UAE_SI_Pdae_09_36.6_1050	0.532
20220525_UAE_SI_Pdae_10_36.6_1050	0.587
20220525_UAE_SI_Pdae_01_32.6_1050	0.615
20220525_UAE_SI_Pdae_02_32.6_1050	0.587
20220525_UAE_SI_Pdae_03_32.6_1050	0.601
20220525_UAE_SI_Pdae_04_32.6_1050	0.594
20220525_UAE_SI_Pdae_05_32.6_1050	0.615
20220525_UAE_SI_Pdae_06_32.6_1050	0.621
20220525_UAE_SI_Pdae_07_32.6_1050	0.589
20220525_UAE_SI_Pdae_08_32.6_1050	0.633
20220525_UAE_SI_Pdae_09_32.6_1050	0.613
20220525_UAE_SI_Pdae_10_32.6_1050	0.64
20220523_UAE_SI_Phar_01_41.6_1050	0.006
20220523_UAE_SI_Phar_02_41.6_1050	0.01
20220523_UAE_SI_Phar_03_41.6_1050	0.009
20220523_UAE_SI_Phar_04_41.6_1050	0.017
20220523_UAE_SI_Phar_05_41.6_1050	0
20220523_UAE_SI_Phar_06_41.6_1050	0.021
20220523_UAE_SI_Phar_07_41.6_1050	0.009
20220523_UAE_SI_Phar_08_41.6_1050	0.006
20220523_UAE_SI_Phar_09_41.6_1050	0.014
20220523_UAE_SI_Phar_10_41.6_1050	0
20220523_UAE_SI_Phar_01_38.6_1050	0.19
20220523_UAE_SI_Phar_02_38.6_1050	0.338
20220523_UAE_SI_Phar_03_38.6_1050	0.3
20220523_UAE_SI_Phar_04_38.6_1050	0.286
20220523_UAE_SI_Phar_05_38.6_1050	0.384
20220523_UAE_SI_Phar_06_38.6_1050	0.042
20220523_UAE_SI_Phar_07_38.6_1050	0.253
20220523_UAE_SI_Phar_08_38.6_1050	0.243
20220523_UAE_SI_Phar_09_38.6_1050	0.222
20220523_UAE_SI_Phar_10_38.6_1050	0.113
20220523_UAE_SI_Phar_01_36.6_1050	0.55
20220523_UAE_SI_Phar_02_36.6_1050	0.441
20220523_UAE_SI_Phar_03_36.6_1050	0.551
20220523_UAE_SI_Phar_04_36.6_1050	0.377
20220523_UAE_SI_Phar_05_36.6_1050	0.556
20220523_UAE_SI_Phar_06_36.6_1050	0.369
20220523_UAE_SI_Phar_07_36.6_1050	0.594
20220523_UAE_SI_Phar_08_36.6_1050	0.451
20220523_UAE_SI_Phar_09_36.6_1050	0.458
20220523_UAE_SI_Phar_10_36.6_1050	0.422
20220523_UAE_SI_Phar_01_32.6_1050	0.607
20220523_UAE_SI_Phar_02_32.6_1050	0.64
20220523_UAE_SI_Phar_03_32.6_1050	0.613
20220523_UAE_SI_Phar_04_32.6_1050	0.608
20220523_UAE_SI_Phar_05_32.6_1050	0.622
20220523_UAE_SI_Phar_06_32.6_1050	0.589
20220523_UAE_SI_Phar_07_32.6_1050	0.629
20220523_UAE_SI_Phar_08_32.6_1050	0.578
20220523_UAE_SI_Phar_09_32.6_1050	0.585
20220523_UAE_SI_Phar_10_32.6_1050	0.61
