# Supplementary material for: Summer temperature maxima already challenge thermal capacities of coral in the Southern Persian/Arabian Gulf
Source: Research Square preprint supplement (doi:10.21203/rs.3.rs-8231598/v1), 2025-12-04
Supplement: Supplementary file 3 [file bb3d0d98107672b35e0496fb.xlsx]

## Sheet: T1 RelED50
Table 1. Shapiro-Wilk results			Table 2. Bartlett test of homogeneity of variances					Table 4. Pairwise Welch t-tests with Bonferroni-adjusted p-values for T1 relative ED50 ~ Species_site. Red highlighted values < 0.05.
for T1 relative ED50 ~ Species_site			for T1 relative ED50 ~ Species_site
Species_site	Shapiro-Wilk		df	K-squared	P-value				Ahem_AF	Ahem_AW	Ahem_EI	Ahem_YB	Cmic_AA	Cmic_SA	Cmic_SY	Pdae_AA	Pdae_SY	Phar_AA	Phar_SA	Phar_SY	Plob_AF	Plob_AQ	Plob_AW	Plob_YB	Pver_AF	Pver_AW	Pver_EI	Pver_YB	Spis_AF	Spis_AW	Spis_EI
Ahem_AF	0.138948		23	56.928	0.0001049			Ahem_AW	1	-	-	-	-	-	-	-	-	-	-	-	-	-	-	-	-	-	-	-	-	-	-
Ahem_AW	0.361072							Ahem_EI	1.1e-08	1e-08	-	-	-	-	-	-	-	-	-	-	-	-	-	-	-	-	-	-	-	-	-
Ahem_EI	0.433154							Ahem_YB	1	1	5.6e-10	-	-	-	-	-	-	-	-	-	-	-	-	-	-	-	-	-	-	-	-
Ahem_YB	0.919418							Cmic_AA	0.00438	0.00024	3.7e-09	0.00532	-	-	-	-	-	-	-	-	-	-	-	-	-	-	-	-	-	-	-
Cmic_SA	0.361189		Table 3. Welch's ANOVA					Cmic_SA	6.5e-08	2.2e-08	3.9e-11	2e-07	0.0001	-	-	-	-	-	-	-	-	-	-	-	-	-	-	-	-	-	-
Cmic_AA	0.168379		for T1 relative ED50 ~ Species_site					Cmic_SY	6.3e-10	6.5e-11	2.3e-14	4.1e-10	2.3e-05	1	-	-	-	-	-	-	-	-	-	-	-	-	-	-	-	-	-
Cmic_SY	0.805744		num. df	denom. df	F value	P-value		Pdae_AA	0.00636	6.2e-05	1.3e-11	0.00354	1	2.7e-06	2.4e-08	-	-	-	-	-	-	-	-	-	-	-	-	-	-	-	-
Pdae_AA	0.16014		23	57.8	246.5	< 2.2e-16		Pdae_SY	1.4e-07	4.5e-09	5.8e-13	5.5e-10	0.00017	1	1	2.1e-07	-	-	-	-	-	-	-	-	-	-	-	-	-	-	-
Pdae_SY	0.976962							Phar_AA	0.32074	0.02364	6.6e-07	0.36498	1	0.00031	0.00026	1	0.00109	-	-	-	-	-	-	-	-	-	-	-	-	-	-
Phar_SA	0.284398							Phar_SA	9.5e-08	1.3e-09	8.3e-15	5.6e-10	0.01614	0.40196	0.01085	9.2e-06	3.7e-05	0.04273	-	-	-	-	-	-	-	-	-	-	-	-	-
Phar_AA	0.0442586							Phar_SY	1.4e-07	3.1e-08	1.8e-11	3.3e-07	0.00225	1	1	2.1e-05	1	0.00481	1	-	-	-	-	-	-	-	-	-	-	-	-
Phar_SY	0.00245866							Plob_AF	1	1	0.00458	1	1	0.00515	0.00923	1	0.0233	1	0.12993	0.02346	-	-	-	-	-	-	-	-	-	-	-
Plob_AF	0.434269							Plob_AQ	8.7e-08	2.8e-09	2.9e-13	1.6e-09	0.00123	1	1	1e-06	0.09292	0.00589	0.60657	1	0.05159	-	-	-	-	-	-	-	-	-	-
Plob_AQ	0.645491							Plob_AW	1	1	7e-05	1	0.04688	1.6e-06	5.2e-06	0.37207	0.00023	0.77599	0.00066	1.1e-05	1	0.0003	-	-	-	-	-	-	-	-	-
Plob_AW	0.0569404							Plob_YB	1	1	0.00103	1	0.77811	0.00016	0.00048	1	0.0031	1	0.0137	0.00094	1	0.00573	1	-	-	-	-	-	-	-	-
Plob_YB	0.440576							Pver_AF	0.25746	0.05018	0.00011	0.3563	1	0.00216	0.00366	1	0.02573	1	0.25099	0.0222	1	0.06537	0.36369	1	-	-	-	-	-	-	-
Pver_AF	0.780048							Pver_AW	0.81902	0.02902	7.1e-07	0.8756	1	4.3e-06	2.3e-06	1	0.00016	1	0.00085	3.7e-05	1	0.00025	1	1	1	-	-	-	-	-	-
Pver_AW	0.690726							Pver_EI	0.11404	1	0.00507	0.12189	6.4e-05	6.1e-08	5.4e-07	0.00062	4.4e-05	0.00054	5.9e-05	3.3e-07	0.47676	3.9e-05	0.21456	0.34823	0.00108	0.00238	-	-	-	-	-
Pver_EI	0.329183							Pver_YB	0.08037	0.00213	2.6e-08	0.07674	1	3.6e-06	3.3e-07	1	3.2e-05	1	0.00018	2.6e-05	1	4.8e-05	1	1	1	1	0.00139	-	-	-	-
Pver_YB	0.596894							Spis_AF	1	0.01564	5.6e-09	1	0.32013	4.9e-07	9.4e-09	1	1.4e-06	1	2.6e-06	1.8e-06	1	1.3e-06	1	1	1	1	0.00891	1	-	-	-
Spis_AF	0.559168							Spis_AW	1	0.77821	4.7e-05	1	1	3.4e-05	8.1e-05	1	0.00129	1	0.00707	0.00029	1	0.00243	1	1	1	1	0.01348	1	1	-	-
Spis_AW	0.935995							Spis_EI	1	1	0.00172	1	0.00089	4.5e-07	3.1e-06	0.00755	0.00013	0.00781	0.00024	2.6e-06	1	0.00014	1	1	0.00826	0.03511	1	0.01688	0.12515	0.19894	-
Spis_EI	0.60353							Spis_YB	1	1	0.00053	1	0.02787	4.6e-06	2.1e-05	0.20873	0.00045	0.27376	0.00128	3e-05	1	0.00062	1	1	0.15158	1	1	0.50424	1	1	1
Spis_YB	0.0799126

## Sheet: T2 RelED50
Table 5. Shapiro-Wilk results				Table 8. Pairwise Welch t-tests with Bonferroni-adjusted p-values for T2 relative ED50 ~ Species_site.
for T2 relative ED50 ~ Species_site				Red highlighted values < 0.05.
Species_site	Shapiro-Wilk				Cmic_SA	Cmic_AA	Cmic_SY	Pdae_AA	Pdae_SY	Phar_SA	Phar_AA
Cmic_SA	0.126787			Cmic_AA	0.00562	-	-	-	-	-	-
Cmic_AA	0.103111			Cmic_SY	1	0.29612	-	-	-	-	-
Cmic_SY	0.111729			Pdae_AA	3.3e-06	1.1e-05	0.00017	-	-	-	-
Pdae_AA	0.840358			Pdae_SY	0.03535	1	1	6.3e-05	-	-	-
Pdae_SY	0.00108342			Phar_SA	1	1	1	0.21856	1	-	-
Phar_SA	4.32977e-06			Phar_AA	4.5e-06	9.4e-05	0.00027	1	0.00021	0.35374	-
Phar_AA	0.856196			Phar_SY	0.00345	1	0.19262	0.00014	1	1	0.00077
Phar_SY	0.00256096
Table 6. Bartlett test of homogeneity of variances
for T2 relative ED50 ~ Species_site
df	K-squared	P-value
7	29.248	0.0001304
Table 7. Welch's ANOVA
for T2 relative ED50 ~ Species_site
num. df	denom. df	F value	P-value
7	30.6	25.639	3.896e-11

## Sheet: T1 RelED5
Table 9. Shapiro-Wilk results				Table 12. Pairwise Welch t-tests with Bonferroni-adjusted p-values for T1 relative ED50 ~ Species_site.
for T1 relative ED5 ~ Species_site.				Red highlighted values < 0.05.
Species_site	Shapiro-Wilk				Cmic_SA	Cmic_AA	Cmic_SY	Pdae_AA	Pdae_SY	Phar_SA	Phar_AA
Cmic_SA	0.108297			Cmic_AA	0.02485	-	-	-	-	-	-
Cmic_SI	0.84932			Cmic_SY	1	8e-05	-	-	-	-	-
Cmic_SY	0.612987			Pdae_AA	0.02132	1	3.8e-05	-	-	-	-
Pdae_SI	0.0469746			Pdae_SY	1	0.00025	1	9.8e-05	-	-	-
Pdae_SY	0.972153			Phar_SA	1	0.3724	0.21603	0.26059	0.74415	-	-
Phar_SA	0.0404021			Phar_AA	0.04606	1	0.00092	1	0.00292	0.82076	-
Phar_SI	0.152614			Phar_SY	1	1	0.15419	1	0.43978	1	1
Phar_SY	0.000847383
Table 10. Bartlett test of homogeneity of variances
for T1 relative ED5 ~ Species_site.
df	K-squared	P-value
7	8.685	0.2761
Table 11. Welch's ANOVA
for T1 relative ED5 ~ Species_site.
num. df	denom. df	F value	P-value
7	30.7	13.48	8.183e-08

## Sheet: T2 RelED5
Table 13. Shapiro-Wilk results					Table 16. Pairwise Welch t-tests with Bonferroni-adjusted p-values for T2 relative ED50 ~ Species_site.
for T2 relative ED5 ~ Species_site.					Red highlighted values < 0.05.
Species_site	Shapiro-Wilk					Cmic_SA	Cmic_AA	Cmic_SY	Pdae_AA	Pdae_SY	Phar_SA	Phar_AA
Cmic_SA	0.104106				Cmic_AA	0.00322	-	-	-	-	-	-
Cmic_AA	0.118503				Cmic_SY	1	0.44448	-	-	-	-	-
Cmic_SY	0.0693499				Pdae_AA	1.3e-05	0.22091	0.00889	-	-	-	-
Pdae_AA	0.508504				Pdae_SY	0.0212	1	1	0.00015	-	-	-
Pdae_SY	0.743933				Phar_SA	1	1	1	1	1	-	-
Phar_SA	2.62927e-05				Phar_AA	0.00117	1	0.16489	1	0.94288	1	-
Phar_AA	0.577737				Phar_SY	0.0437	1	1	0.18305	1	1	1
Phar_SY	0.0365404
Table 14. Bartlett test of homogeneity of variances
for T2 relative ED5 ~ Species_site.
df	K-squared	P-value
7	37.043	4.604e-06
Table 15. Welch's ANOVA
for T2 relative ED5 ~ Species_site.
num. df	denom. df	F value	P-value
7	30.4	13.009	1.293e-07
