# Supplementary material for: Summer temperature maxima already challenge thermal capacities of coral in the Southern Persian/Arabian Gulf
Source: Research Square preprint supplement (doi:10.21203/rs.3.rs-8231598/v1), 2025-12-04
Supplement: Supplementary file 4 [file dd31311e3a359c4ebd2e8ddc.xlsx]

## Sheet: S1_ED50
Table S1. Effective Dose 50 (ED50) results for a) timepoint 1 and b) timepoint 2. Sample ID denotes species_site_colony. Coral species: Cyphrastrea microthphalma (Cmic), Platygyra daedalea (Pdae) and Porites harissoni (Phar).
a)	Timepoint 1						b)	Timepoint 2
	Saada Reef (SA)		Sadiyatt Reef (SY)		Al Aqah (AA)			Saada Reef (SA)		Sadiyatt Reef (SY)		Al Aqah (AA)
	Sample ID	ED50	Sample ID	ED50	Sample ID	ED50		Sample ID	ED50	Sample ID	ED50	Sample ID	ED50
	Cmic_SA_01	37.4821	Cmic_SY_01	37.3433	Cmic_AA_01	37.7114		Cmic_SA_01	36.5551	Cmic_SY_01	35.1907	Cmic_AA_01	35.3897
	Cmic_SA_02	36.7199	Cmic_SY_02	38.1136	Cmic_AA_02	37.8298		Cmic_SA_02	34.7053	Cmic_SY_02	37.0543	Cmic_AA_02	36.6033
	Cmic_SA_03	38.3485	Cmic_SY_03	37.8171	Cmic_AA_03	39.1069		Cmic_SA_03	37.9124	Cmic_SY_03	37.7828	Cmic_AA_03	35.5408
	Cmic_SA_04	37.3527	Cmic_SY_04	37.7858	Cmic_AA_04	38.6357		Cmic_SA_04	35.2687	Cmic_SY_04	36.2342	Cmic_AA_04	36.6828
	Cmic_SA_05	38.3831	Cmic_SY_05	37.3375	Cmic_AA_05	38.901		Cmic_SA_05	35.3006	Cmic_SY_05	37.3063	Cmic_AA_05	36.329
	Cmic_SA_06	37.643	Cmic_SY_06	36.8195	Cmic_AA_06	37.8164		Cmic_SA_06	36.4264	Cmic_SY_06	34.7323	Cmic_AA_06	36.639
	Cmic_SA_07	37.9924	Cmic_SY_07	37.9631	Cmic_AA_07	37.8943		Cmic_SA_07	35.4755	Cmic_SY_07	37.61	Cmic_AA_07	36.8522
	Cmic_SA_08	37.9071	Cmic_SY_08	37.2939	Cmic_AA_08	38.5243		Cmic_SA_08	35.3067	Cmic_SY_08	37.4796	Cmic_AA_08	36.498
	Cmic_SA_09	38.0828	Cmic_SY_09	37.5569	Cmic_AA_09	37.9808		Cmic_SA_09	37.3835	Cmic_SY_09	35.5858	Cmic_AA_09	36.934
	Cmic_SA_10	38.4221	Cmic_SY_10	37.6738	Cmic_AA_10	37.5502		Cmic_SA_10	35.4022	Cmic_SY_10	34.7733	Cmic_AA_10	35.7812
	Phar_SA_01	38.694	Pdae_SY_01	37.4921	Pdae_AA_01	38.5617		Phar_SA_01	38.0106	Pdae_SY_01	37.942	Pdae_AA_01	38.5709
	Phar_SA_02	38.6414	Pdae_SY_02	37.4998	Pdae_AA_02	38.178		Phar_SA_02	37.8287	Pdae_SY_02	35.3606	Pdae_AA_02	38.0596
	Phar_SA_03	38.7233	Pdae_SY_03	37.5848	Pdae_AA_03	38.1507		Phar_SA_03	38.6603	Pdae_SY_03	37.5757	Pdae_AA_03	37.8086
	Phar_SA_04	38.8511	Pdae_SY_04	37.5294	Pdae_AA_04	38.0563		Phar_SA_04	38.1194	Pdae_SY_04	36.7406	Pdae_AA_04	37.8251
	Phar_SA_05	38.7353	Pdae_SY_05	37.6712	Pdae_AA_05	38.5413		Phar_SA_05	38.5428	Pdae_SY_05	37.8349	Pdae_AA_05	38.1402
	Phar_SA_06	38.568	Pdae_SY_06	37.8176	Pdae_AA_06	39.0411		Phar_SA_06	38.484	Pdae_SY_06	37.2904	Pdae_AA_06	38.9895
	Phar_SA_07	38.4624	Pdae_SY_07	37.6753	Pdae_AA_07	38.208		Phar_SA_07	37.961	Pdae_SY_07	37.6448	Pdae_AA_07	38.162
	Phar_SA_08	38.8206	Pdae_SY_08	37.3013	Pdae_AA_08	39.052		Phar_SA_08	38.5107	Pdae_SY_08	37.6445	Pdae_AA_08	38.8053
	Phar_SA_09	38.2922	Pdae_SY_09	37.7642	Pdae_AA_09	38.6523		Phar_SA_09	32.0371	Pdae_SY_09	37.8412	Pdae_AA_09	37.2056
	Phar_SA_10	38.1533	Pdae_SY_10	37.8695	Pdae_AA_10	38.9459		Phar_SA_10	37.9286	Pdae_SY_10	37.7969	Pdae_AA_10	38.5728
			Phar_SY_01	37.9817	Phar_AA_01	38.5371				Phar_SY_01	37.9477	Phar_AA_01	38.0733
			Phar_SY_02	38.031	Phar_AA_02	39.1091				Phar_SY_02	36.1786	Phar_AA_02	38.3203
			Phar_SY_03	38.2244	Phar_AA_03	38.8105				Phar_SY_03	37.984	Phar_AA_03	38.5571
			Phar_SY_04	36.7565	Phar_AA_04	38.4721				Phar_SY_04	36.996	Phar_AA_04	37.7164
			Phar_SY_05	38.3971	Phar_AA_05	39.0966				Phar_SY_05	38.2749	Phar_AA_05	38.987
			Phar_SY_06	38.3293	Phar_AA_06	36.8279				Phar_SY_06	38.064	Phar_AA_06	36.9286
			Phar_SY_07	37.8953	Phar_AA_07	38.9875				Phar_SY_07	38.0884	Phar_AA_07	38.3451
			Phar_SY_08	38.5011	Phar_AA_08	38.3941				Phar_SY_08	38.188	Phar_AA_08	38.1471
			Phar_SY_09	38.1775	Phar_AA_09	38.5694				Phar_SY_09	37.7264	Phar_AA_09	38.0155
			Phar_SY_10	38.3674	Phar_AA_10	37.5337				Phar_SY_10	38.2213	Phar_AA_10	37.2868

## Sheet: S2_Rel.ED50
Table S2. Relative Effective Dose 50 (Rel. ED50) results for a) timepoint 1 and b) timepoint 2. Sample ID denotes species_site_colony. Coral species: Cyphrastrea microthphalma (Cmic), Platygyra daedalea (Pdae) and Porites harissoni (Phar).
a)	Timepoint 1						b)	Timepoint 2
	Saada Reef (SA)		Sadiyatt Reef (SY)		Al Aqah (AA)			Saada Reef (SA)		Sadiyatt Reef (SY)		Al Aqah (AA)
	Sample ID	Rel. ED50	Sample ID	Rel. ED50	Sample ID	Rel. ED50		Sample ID	Rel. ED50	Sample ID	Rel. ED50	Sample ID	Rel. ED50
	Cmic_SA_01	3.39	Cmic_SY_01	3.46	Cmic_AA_01	5.15		Cmic_SA_01	2.46514	Cmic_SY_01	1.31075	Cmic_AA_01	2.82972
	Cmic_SA_02	2.63	Cmic_SY_02	4.23	Cmic_AA_02	5.27		Cmic_SA_02	0.615344	Cmic_SY_02	3.17427	Cmic_AA_02	4.04326
	Cmic_SA_03	4.26	Cmic_SY_03	3.94	Cmic_AA_03	6.55		Cmic_SA_03	3.82242	Cmic_SY_03	3.90277	Cmic_AA_03	2.98076
	Cmic_SA_04	3.26	Cmic_SY_04	3.91	Cmic_AA_04	6.08		Cmic_SA_04	1.17874	Cmic_SY_04	2.35417	Cmic_AA_04	4.12282
	Cmic_SA_05	4.29	Cmic_SY_05	3.46	Cmic_AA_05	6.34		Cmic_SA_05	1.21062	Cmic_SY_05	3.42627	Cmic_AA_05	3.769
	Cmic_SA_06	3.55	Cmic_SY_06	2.94	Cmic_AA_06	5.26		Cmic_SA_06	2.33644	Cmic_SY_06	0.852305	Cmic_AA_06	4.07898
	Cmic_SA_07	3.9	Cmic_SY_07	4.08	Cmic_AA_07	5.33		Cmic_SA_07	1.38546	Cmic_SY_07	3.72998	Cmic_AA_07	4.29222
	Cmic_SA_08	3.82	Cmic_SY_08	3.41	Cmic_AA_08	5.96		Cmic_SA_08	1.21667	Cmic_SY_08	3.5996	Cmic_AA_08	3.93798
	Cmic_SA_09	3.99	Cmic_SY_09	3.68	Cmic_AA_09	5.42		Cmic_SA_09	3.29349	Cmic_SY_09	1.70584	Cmic_AA_09	4.37397
	Cmic_SA_10	4.33	Cmic_SY_10	3.79	Cmic_AA_10	4.99		Cmic_SA_10	1.31215	Cmic_SY_10	0.893308	Cmic_AA_10	3.22119
	Phar_SA_01	4.6	Pdae_SY_01	3.61	Pdae_AA_01	6		Phar_SA_01	3.92057	Pdae_SY_01	4.06201	Pdae_AA_01	6.01095
	Phar_SA_02	4.55	Pdae_SY_02	3.62	Pdae_AA_02	5.62		Phar_SA_02	3.73872	Pdae_SY_02	1.48058	Pdae_AA_02	5.49956
	Phar_SA_03	4.63	Pdae_SY_03	3.7	Pdae_AA_03	5.59		Phar_SA_03	4.57034	Pdae_SY_03	3.69565	Pdae_AA_03	5.24859
	Phar_SA_04	4.76	Pdae_SY_04	3.65	Pdae_AA_04	5.5		Phar_SA_04	4.02944	Pdae_SY_04	2.86059	Pdae_AA_04	5.26514
	Phar_SA_05	4.65	Pdae_SY_05	3.79	Pdae_AA_05	5.98		Phar_SA_05	4.45284	Pdae_SY_05	3.95492	Pdae_AA_05	5.58019
	Phar_SA_06	4.48	Pdae_SY_06	3.72	Pdae_AA_06	6.48		Phar_SA_06	4.394	Pdae_SY_06	3.41043	Pdae_AA_06	6.42952
	Phar_SA_07	4.37	Pdae_SY_07	3.8	Pdae_AA_07	5.64		Phar_SA_07	3.871	Pdae_SY_07	3.76476	Pdae_AA_07	5.60196
	Phar_SA_08	4.73	Pdae_SY_08	3.42	Pdae_AA_08	6.49		Phar_SA_08	4.42067	Pdae_SY_08	3.76451	Pdae_AA_08	6.2453
	Phar_SA_09	4.2	Pdae_SY_09	3.88	Pdae_AA_09	6.09		Phar_SA_09	-2.05291	Pdae_SY_09	3.96122	Pdae_AA_09	4.64559
	Phar_SA_10	4.06	Pdae_SY_10	3.99	Pdae_AA_10	6.39		Phar_SA_10	3.83859	Pdae_SY_10	3.91693	Pdae_AA_10	6.01275
			Phar_SY_01	4.1	Phar_AA_01	5.98				Phar_SY_01	4.06774	Phar_AA_01	5.51326
			Phar_SY_02	4.15	Phar_AA_02	6.56				Phar_SY_02	2.29858	Phar_AA_02	5.76027
			Phar_SY_03	4.34	Phar_AA_03	6.25				Phar_SY_03	4.10396	Phar_AA_03	5.99709
			Phar_SY_04	2.88	Phar_AA_04	5.87				Phar_SY_04	3.11605	Phar_AA_04	5.15639
			Phar_SY_05	4.52	Phar_AA_05	6.54				Phar_SY_05	4.39488	Phar_AA_05	6.42704
			Phar_SY_06	4.45	Phar_AA_06	4.27				Phar_SY_06	4.18404	Phar_AA_06	4.36858
			Phar_SY_07	4.02	Phar_AA_07	6.43				Phar_SY_07	4.20839	Phar_AA_07	5.78511
			Phar_SY_08	4.62	Phar_AA_08	5.84				Phar_SY_08	4.308	Phar_AA_08	5.58714
			Phar_SY_09	4.3	Phar_AA_09	6.01				Phar_SY_09	3.84642	Phar_AA_09	5.45551
			Phar_SY_10	4.49	Phar_AA_10	4.98				Phar_SY_10	4.3413	Phar_AA_10	4.72683

## Sheet: S3_ED5
Table S3. Effective Dose 5 (ED5) results for a) timepoint 1 and b) timepoint 2. Sample ID denotes species_site_colony. Coral species: Cyphrastrea microthphalma (Cmic), Platygyra daedalea (Pdae) and Porites harissoni (Phar).
a)	Timepoint 1						b)	Timepoint 2
	Saada Reef (SA)		Sadiyatt Reef (SY)		Al Aqah (AA)			Saada Reef (SA)		Sadiyatt Reef (SY)		Al Aqah (AA)
	Sample ID	ED5	Sample ID	ED5	Sample ID	ED5		Sample ID	ED5	Sample ID	ED5	Sample ID	ED5
	Cmic_SA_01	34.4303	Cmic_SY_01	34.4748	Cmic_AA_01	35.9269		Cmic_SA_01	0.14029	Cmic_SY_01	-1.91222	Cmic_AA_01	0.0147752
	Cmic_SA_02	32.4002	Cmic_SY_02	36.0354	Cmic_AA_02	34.6221		Cmic_SA_02	-2.63401	Cmic_SY_02	1.64368	Cmic_AA_02	2.49853
	Cmic_SA_03	35.8993	Cmic_SY_03	34.2934	Cmic_AA_03	37.2254		Cmic_SA_03	1.13748	Cmic_SY_03	2.40611	Cmic_AA_03	1.51006
	Cmic_SA_04	34.3238	Cmic_SY_04	35.2581	Cmic_AA_04	37.0087		Cmic_SA_04	-0.0492866	Cmic_SY_04	-1.25274	Cmic_AA_04	2.87241
	Cmic_SA_05	36.164	Cmic_SY_05	35.0743	Cmic_AA_05	36.4043		Cmic_SA_05	-0.0495697	Cmic_SY_05	2.04838	Cmic_AA_05	2.42964
	Cmic_SA_06	35.5649	Cmic_SY_06	33.226	Cmic_AA_06	35.6851		Cmic_SA_06	-0.0696036	Cmic_SY_06	0.049775	Cmic_AA_06	3.17204
	Cmic_SA_07	35.8526	Cmic_SY_07	35.9255	Cmic_AA_07	36.0956		Cmic_SA_07	0.291451	Cmic_SY_07	2.37036	Cmic_AA_07	3.1492
	Cmic_SA_08	36.6936	Cmic_SY_08	34.3408	Cmic_AA_08	36.2999		Cmic_SA_08	-1.36075	Cmic_SY_08	2.24784	Cmic_AA_08	2.97464
	Cmic_SA_09	36.8957	Cmic_SY_09	34.4567	Cmic_AA_09	36.0466		Cmic_SA_09	1.36856	Cmic_SY_09	-0.216465	Cmic_AA_09	3.50388
	Cmic_SA_10	36.4528	Cmic_SY_10	35.5685	Cmic_AA_10	35.0704		Cmic_SA_10	0.222241	Cmic_SY_10	-1.40927	Cmic_AA_10	1.38384
	Phar_SA_01	34.8819	Pdae_SY_01	33.6574	Pdae_AA_01	35.6535		Phar_SA_01	2.26383	Pdae_SY_01	1.34487	Pdae_AA_01	3.10862
	Phar_SA_02	37.091	Pdae_SY_02	34.8358	Pdae_AA_02	35.8315		Phar_SA_02	0.624743	Pdae_SY_02	0.319889	Pdae_AA_02	3.78072
	Phar_SA_03	37.4876	Pdae_SY_03	34.8998	Pdae_AA_03	35.4265		Phar_SA_03	3.01937	Pdae_SY_03	1.5807	Pdae_AA_03	3.48232
	Phar_SA_04	36.7879	Pdae_SY_04	34.9747	Pdae_AA_04	35.5752		Phar_SA_04	1.92889	Pdae_SY_04	1.81552	Pdae_AA_04	3.23783
	Phar_SA_05	36.5276	Pdae_SY_05	35.8739	Pdae_AA_05	35.3296		Phar_SA_05	2.06366	Pdae_SY_05	2.0412	Pdae_AA_05	2.17404
	Phar_SA_06	36.9709	Pdae_SY_06	35.0885	Pdae_AA_06	36.9593		Phar_SA_06	3.06517	Pdae_SY_06	1.24963	Pdae_AA_06	4.5282
	Phar_SA_07	35.9495	Pdae_SY_07	35.3433	Pdae_AA_07	36.0462		Phar_SA_07	1.84341	Pdae_SY_07	1.37628	Pdae_AA_07	4.02726
	Phar_SA_08	37.1807	Pdae_SY_08	34.3627	Pdae_AA_08	36.9307		Phar_SA_08	3.15111	Pdae_SY_08	2.65309	Pdae_AA_08	3.93347
	Phar_SA_09	34.1767	Pdae_SY_09	35.7399	Pdae_AA_09	35.8752		Phar_SA_09	-7.72309	Pdae_SY_09	2.26536	Pdae_AA_09	3.7051
	Phar_SA_10	36.9039	Pdae_SY_10	36.6372	Pdae_AA_10	36.8997		Phar_SA_10	2.8883	Pdae_SY_10	2.3146	Pdae_AA_10	3.68574
			Phar_SY_01	37.0752	Phar_AA_01	36.4401				Phar_SY_01	2.84468	Phar_AA_01	3.60282
			Phar_SY_02	35.6234	Phar_AA_02	36.6112				Phar_SY_02	0.44416	Phar_AA_02	1.6965
			Phar_SY_03	37.3446	Phar_AA_03	36.3623				Phar_SY_03	3.3073	Phar_AA_03	3.56455
			Phar_SY_04	32.948	Phar_AA_04	35.9538				Phar_SY_04	-1.04731	Phar_AA_04	0.383578
			Phar_SY_05	37.6022	Phar_AA_05	37.5761				Phar_SY_05	3.17451	Phar_AA_05	4.31124
			Phar_SY_06	36.6093	Phar_AA_06	33.4149				Phar_SY_06	2.72099	Phar_AA_06	2.52661
			Phar_SY_07	36.9984	Phar_AA_07	36.7867				Phar_SY_07	1.95699	Phar_AA_07	3.94304
			Phar_SY_08	36.9021	Phar_AA_08	35.404				Phar_SY_08	1.95487	Phar_AA_08	2.39675
			Phar_SY_09	37.2975	Phar_AA_09	35.8828				Phar_SY_09	1.92042	Phar_AA_09	2.35539
			Phar_SY_10	36.7827	Phar_AA_10	35.7642				Phar_SY_10	2.90113	Phar_AA_10	2.26637

## Sheet: S4_Rel.ED5
Table S4. Relative Effective Dose 5 (Rel. ED5) results for a) timepoint 1 and b) timepoint 2. Sample ID denotes species_site_colony. Coral species: Cyphrastrea microthphalma (Cmic), Platygyra daedalea (Pdae) and Porites harissoni (Phar).
a)	Timepoint 1						b)	Timepoint 2
	Saada Reef (SA)		Sadiyatt Reef (SY)		Al Aqah (AA)			Saada Reef (SA)		Sadiyatt Reef (SY)		Al Aqah (AA)
	Sample ID	Rel. ED5	Sample ID	Rel. ED5	Sample ID	Rel. ED5		Sample ID	Rel. ED5	Sample ID	Rel. ED5	Sample ID	Rel. ED5
	Cmic_SA_01	0.340273	Cmic_SY_01	0.594755	Cmic_AA_01	3.36686		Cmic_SA_01	0.14029	Cmic_SY_01	-1.91222	Cmic_AA_01	0.0147752
	Cmic_SA_02	-1.68977	Cmic_SY_02	2.1554	Cmic_AA_02	2.06214		Cmic_SA_02	-2.63401	Cmic_SY_02	1.64368	Cmic_AA_02	2.49853
	Cmic_SA_03	1.80926	Cmic_SY_03	0.413369	Cmic_AA_03	4.66535		Cmic_SA_03	1.13748	Cmic_SY_03	2.40611	Cmic_AA_03	1.51006
	Cmic_SA_04	0.233826	Cmic_SY_04	1.37813	Cmic_AA_04	4.44866		Cmic_SA_04	-0.0492866	Cmic_SY_04	-1.25274	Cmic_AA_04	2.87241
	Cmic_SA_05	2.07402	Cmic_SY_05	1.1943	Cmic_AA_05	3.84426		Cmic_SA_05	-0.0495697	Cmic_SY_05	2.04838	Cmic_AA_05	2.42964
	Cmic_SA_06	1.47489	Cmic_SY_06	-0.653983	Cmic_AA_06	3.12515		Cmic_SA_06	-0.0696036	Cmic_SY_06	0.049775	Cmic_AA_06	3.17204
	Cmic_SA_07	1.76258	Cmic_SY_07	2.04552	Cmic_AA_07	3.53559		Cmic_SA_07	0.291451	Cmic_SY_07	2.37036	Cmic_AA_07	3.1492
	Cmic_SA_08	2.60363	Cmic_SY_08	0.460751	Cmic_AA_08	3.73993		Cmic_SA_08	-1.36075	Cmic_SY_08	2.24784	Cmic_AA_08	2.97464
	Cmic_SA_09	2.80568	Cmic_SY_09	0.576687	Cmic_AA_09	3.48655		Cmic_SA_09	1.36856	Cmic_SY_09	-0.216465	Cmic_AA_09	3.50388
	Cmic_SA_10	2.36277	Cmic_SY_10	1.68847	Cmic_AA_10	2.51036		Cmic_SA_10	0.222241	Cmic_SY_10	-1.40927	Cmic_AA_10	1.38384
	Phar_SA_01	0.791893	Pdae_SY_01	-0.222602	Pdae_AA_01	3.09352		Phar_SA_01	2.26383	Pdae_SY_01	1.34487	Pdae_AA_01	3.10862
	Phar_SA_02	3.00105	Pdae_SY_02	0.955782	Pdae_AA_02	3.27148		Phar_SA_02	0.624743	Pdae_SY_02	0.319889	Pdae_AA_02	3.78072
	Phar_SA_03	3.39762	Pdae_SY_03	1.01976	Pdae_AA_03	2.86654		Phar_SA_03	3.01937	Pdae_SY_03	1.5807	Pdae_AA_03	3.48232
	Phar_SA_04	2.69792	Pdae_SY_04	1.09474	Pdae_AA_04	3.01519		Phar_SA_04	1.92889	Pdae_SY_04	1.81552	Pdae_AA_04	3.23783
	Phar_SA_05	2.43757	Pdae_SY_05	1.99388	Pdae_AA_05	2.76962		Phar_SA_05	2.06366	Pdae_SY_05	2.0412	Pdae_AA_05	2.17404
	Phar_SA_06	2.88095	Pdae_SY_06	1.20847	Pdae_AA_06	4.39925		Phar_SA_06	3.06517	Pdae_SY_06	1.24963	Pdae_AA_06	4.5282
	Phar_SA_07	1.8595	Pdae_SY_07	1.46332	Pdae_AA_07	3.48616		Phar_SA_07	1.84341	Pdae_SY_07	1.37628	Pdae_AA_07	4.02726
	Phar_SA_08	3.09075	Pdae_SY_08	0.48275	Pdae_AA_08	4.37067		Phar_SA_08	3.15111	Pdae_SY_08	2.65309	Pdae_AA_08	3.93347
	Phar_SA_09	0.0867309	Pdae_SY_09	1.85985	Pdae_AA_09	3.31524		Phar_SA_09	-7.72309	Pdae_SY_09	2.26536	Pdae_AA_09	3.7051
	Phar_SA_10	2.81387	Pdae_SY_10	2.75723	Pdae_AA_10	4.33975		Phar_SA_10	2.8883	Pdae_SY_10	2.3146	Pdae_AA_10	3.68574
			Phar_SY_01	3.19523	Phar_AA_01	3.88005				Phar_SY_01	2.84468	Phar_AA_01	3.60282
			Phar_SY_02	1.74336	Phar_AA_02	4.05121				Phar_SY_02	0.44416	Phar_AA_02	1.6965
			Phar_SY_03	3.46459	Phar_AA_03	3.80225				Phar_SY_03	3.3073	Phar_AA_03	3.56455
			Phar_SY_04	-0.931973	Phar_AA_04	3.39379				Phar_SY_04	-1.04731	Phar_AA_04	0.383578
			Phar_SY_05	3.72217	Phar_AA_05	5.01609				Phar_SY_05	3.17451	Phar_AA_05	4.31124
			Phar_SY_06	2.72928	Phar_AA_06	0.854854				Phar_SY_06	2.72099	Phar_AA_06	2.52661
			Phar_SY_07	3.11837	Phar_AA_07	4.22671				Phar_SY_07	1.95699	Phar_AA_07	3.94304
			Phar_SY_08	3.02208	Phar_AA_08	2.84404				Phar_SY_08	1.95487	Phar_AA_08	2.39675
			Phar_SY_09	3.41755	Phar_AA_09	3.32278				Phar_SY_09	1.92042	Phar_AA_09	2.35539
			Phar_SY_10	2.90269	Phar_AA_10	3.20417				Phar_SY_10	2.90113	Phar_AA_10	2.26637

## Sheet: S5_ED95
Table S5. Effective Dose 95 (ED95) results for a) timepoint 1 and b) timepoint 2. Sample ID denotes species_site_colony. Coral species: Cyphrastrea microthphalma (Cmic), Platygyra daedalea (Pdae) and Porites harissoni (Phar).
a)	Timepoint 1						b)	Timepoint 2
	Saada Reef (SA)		Sadiyatt Reef (SY)		Al Aqah (AA)			Saada Reef (SA)		Sadiyatt Reef (SY)		Al Aqah (AA)
	Sample ID	ED95	Sample ID	ED95	Sample ID	ED95		Sample ID	ED95	Sample ID	ED95	Sample ID	ED95
	Cmic_SA_01	39.5845	Cmic_SY_01	38.9103	Cmic_AA_01	41.7637		Cmic_SA_01	39.0379	Cmic_SY_01	38.7386	Cmic_AA_01	38.4479
	Cmic_SA_02	41.3347	Cmic_SY_02	40.6014	Cmic_AA_02	40.3674		Cmic_SA_02	38.2903	Cmic_SY_02	38.6508	Cmic_AA_02	38.216
	Cmic_SA_03	41.0836	Cmic_SY_03	39.125	Cmic_AA_03	40.4765		Cmic_SA_03	40.802	Cmic_SY_03	39.3412	Cmic_AA_03	37.0749
	Cmic_SA_04	40.3343	Cmic_SY_04	41.0051	Cmic_AA_04	40.2707		Cmic_SA_04	36.5411	Cmic_SY_04	40.2398	Cmic_AA_04	37.9774
	Cmic_SA_05	41.5691	Cmic_SY_05	39.2089	Cmic_AA_05	39.5587		Cmic_SA_05	36.6075	Cmic_SY_05	38.737	Cmic_AA_05	37.7196
	Cmic_SA_06	40.075	Cmic_SY_06	40.1301	Cmic_AA_06	40.759		Cmic_SA_06	39.0027	Cmic_SY_06	35.5538	Cmic_AA_06	37.5689
	Cmic_SA_07	39.7826	Cmic_SY_07	38.814	Cmic_AA_07	40.1611		Cmic_SA_07	36.6043	Cmic_SY_07	39.0206	Cmic_AA_07	38.0318
	Cmic_SA_08	40.8851	Cmic_SY_08	40.1694	Cmic_AA_08	40.4912		Cmic_SA_08	38.0871	Cmic_SY_08	38.8819	Cmic_AA_08	37.4874
	Cmic_SA_09	40.0189	Cmic_SY_09	39.0781	Cmic_AA_09	39.9033		Cmic_SA_09	39.4129	Cmic_SY_09	37.6179	Cmic_AA_09	37.8251
	Cmic_SA_10	40.2053	Cmic_SY_10	40.0204	Cmic_AA_10	39.1433		Cmic_SA_10	36.5267	Cmic_SY_10	37.2392	Cmic_AA_10	37.718
	Phar_SA_01	40.8045	Pdae_SY_01	40.7548	Pdae_AA_01	41.7071		Phar_SA_01	39.7428	Pdae_SY_01	40.8688	Pdae_AA_01	41.7094
	Phar_SA_02	41.6156	Pdae_SY_02	41.7775	Pdae_AA_02	40.6782		Phar_SA_02	41.222	Pdae_SY_02	36.5607	Pdae_AA_02	39.8597
	Phar_SA_03	40.9648	Pdae_SY_03	41.4235	Pdae_AA_03	41.0843		Phar_SA_03	40.2761	Pdae_SY_03	39.8167	Pdae_AA_03	39.6614
	Phar_SA_04	40.6488	Pdae_SY_04	41.1669	Pdae_AA_04	40.7105		Phar_SA_04	40.3425	Pdae_SY_04	37.8163	Pdae_AA_04	39.9673
	Phar_SA_05	40.7384	Pdae_SY_05	40.6786	Pdae_AA_05	42.045		Phar_SA_05	41.0899	Pdae_SY_05	39.8506	Pdae_AA_05	41.8804
	Phar_SA_06	39.8426	Pdae_SY_06	40.5895	Pdae_AA_06	41.2402		Phar_SA_06	39.8604	Pdae_SY_06	39.5841	Pdae_AA_06	40.9883
	Phar_SA_07	40.2598	Pdae_SY_07	41.3199	Pdae_AA_07	40.4996		Phar_SA_07	40.103	Pdae_SY_07	40.1951	Pdae_AA_07	39.8044
	Phar_SA_08	39.1608	Pdae_SY_08	41.6367	Pdae_AA_08	41.2952		Phar_SA_08	39.8235	Pdae_SY_08	38.7898	Pdae_AA_08	41.2636
	Phar_SA_09	39.3081	Pdae_SY_09	41.4572	Pdae_AA_09	41.6443		Phar_SA_09	38.9266	Pdae_SY_09	39.6166	Pdae_AA_09	38.1705
	Phar_SA_10	40.4979	Pdae_SY_10	39.3908	Pdae_AA_10	41.1055		Phar_SA_10	38.9033	Pdae_SY_10	39.4702	Pdae_AA_10	41.0492
			Phar_SY_01	42.9226	Phar_AA_01	40.4505				Phar_SY_01	39.2115	Phar_AA_01	40.0846
			Phar_SY_02	40.2565	Phar_AA_02	40.3116				Phar_SY_02	38.1332	Phar_AA_02	42.8661
			Phar_SY_03	39.9997	Phar_AA_03	41.7028				Phar_SY_03	38.7977	Phar_AA_03	41.1534
			Phar_SY_04	41.0299	Phar_AA_04	40.4947				Phar_SY_04	41.6873	Phar_AA_04	43.1807
			Phar_SY_05	41.0765	Phar_AA_05	39.7467				Phar_SY_05	39.5354	Phar_AA_05	41.2243
			Phar_SY_06	40.2339	Phar_AA_06	40.8017				Phar_SY_06	39.5856	Phar_AA_06	38.8673
			Phar_SY_07	41.1509	Phar_AA_07	40.1162				Phar_SY_07	40.4812	Phar_AA_07	40.2801
			Phar_SY_08	40.5328	Phar_AA_08	40.501				Phar_SY_08	40.6956	Phar_AA_08	41.6287
			Phar_SY_09	42.9033	Phar_AA_09	40.9361				Phar_SY_09	39.756	Phar_AA_09	41.3909
			Phar_SY_10	39.4451	Phar_AA_10	39.9037				Phar_SY_10	39.7179	Phar_AA_10	39.9211

## Sheet: S6_DWR
Table S6. Decline width range (DWR) for each species per site. Coral species: Cyphrastrea microthphalma (Cmic), Platygyra daedalea (Pdae) and Porites harissoni (Phar).
Calculated based on the difference between the widest and narrowest decline width (ED95-ED5) within a coral population. Calculated separately for data measured at timepoint 1 and 2 in the CBASS.
	Group (Site, species)	Timepoint 1	Timepoint 2
	Saada Reef, Cmic	6.8	4.62
	Saada Reef, Phar	6.21	10.63
	Saadiyat Reef, Cmic	3.38	5.99
	Saadiyat Reef, Pdae	5.6	3.52
	Saadiyat Reef, Phar	6.45	7.24
	Al Aqah, Cmic	3.39	4.11
	Al Aqah, Pdae	2.51	5.24
	Al Aqah, Phar	4.07	6.46

## Sheet: S7_Rel.ED95
Table S7. Relative Effective Dose 95 (Rel. ED95) results for a) timepoint 1 and b) timepoint 2. Sample ID denotes species_site_colony. Coral species: Cyphrastrea microthphalma (Cmic), Platygyra daedalea (Pdae) and Porites harissoni (Phar).
a)	Timepoint 1						b)	Timepoint 2
	Saada Reef (SA)		Sadiyatt Reef (SY)		Al Aqah (AA)			Saada Reef (SA)		Sadiyatt Reef (SY)		Al Aqah (AA)
	Sample ID	Rel. ED95	Sample ID	Rel. ED95	Sample ID	Rel. ED95		Sample ID	Rel. ED95	Sample ID	Rel. ED95	Sample ID	Rel. ED95
	Cmic_SA_01	6.71449	Cmic_SY_01	6.57049	Cmic_AA_01	7.02452		Cmic_SA_01	4.94789	Cmic_SY_01	4.85865	Cmic_AA_01	5.88791
	Cmic_SA_02	7.52558	Cmic_SY_02	6.43155	Cmic_AA_02	8.77471		Cmic_SA_02	4.20035	Cmic_SY_02	4.7708	Cmic_AA_02	5.65604
	Cmic_SA_03	6.87481	Cmic_SY_03	7.82281	Cmic_AA_03	8.52361		Cmic_SA_03	6.71201	Cmic_SY_03	5.46116	Cmic_AA_03	4.51495
	Cmic_SA_04	6.55881	Cmic_SY_04	6.61466	Cmic_AA_04	7.77435		Cmic_SA_04	2.45107	Cmic_SY_04	6.35982	Cmic_AA_04	5.41736
	Cmic_SA_05	6.64842	Cmic_SY_05	5.86671	Cmic_AA_05	9.00906		Cmic_SA_05	2.51747	Cmic_SY_05	4.85701	Cmic_AA_05	5.15963
	Cmic_SA_06	5.75262	Cmic_SY_06	6.92168	Cmic_AA_06	7.51501		Cmic_SA_06	4.91266	Cmic_SY_06	1.67382	Cmic_AA_06	5.00894
	Cmic_SA_07	6.16983	Cmic_SY_07	6.23619	Cmic_AA_07	7.2226		Cmic_SA_07	2.51427	Cmic_SY_07	5.14059	Cmic_AA_07	5.47182
	Cmic_SA_08	5.07078	Cmic_SY_08	6.62101	Cmic_AA_08	8.32508		Cmic_SA_08	3.99705	Cmic_SY_08	5.00193	Cmic_AA_08	4.92742
	Cmic_SA_09	5.21813	Cmic_SY_09	7.05611	Cmic_AA_09	7.45886		Cmic_SA_09	5.32291	Cmic_SY_09	3.73792	Cmic_AA_09	5.26506
	Cmic_SA_10	6.40787	Cmic_SY_10	6.02373	Cmic_AA_10	7.64535		Cmic_SA_10	2.43669	Cmic_SY_10	3.35917	Cmic_AA_10	5.15799
	Phar_SA_01	8.83263	Pdae_SY_01	7.88374	Pdae_AA_01	9.14705		Phar_SA_01	5.65282	Pdae_SY_01	6.98875	Pdae_AA_01	9.14943
	Phar_SA_02	6.16646	Pdae_SY_02	6.48744	Pdae_AA_02	8.11818		Phar_SA_02	7.13202	Pdae_SY_02	2.68067	Pdae_AA_02	7.2997
	Phar_SA_03	5.90972	Pdae_SY_03	6.5965	Pdae_AA_03	8.52427		Phar_SA_03	6.18613	Pdae_SY_03	5.93674	Pdae_AA_03	7.10141
	Phar_SA_04	6.93988	Pdae_SY_04	6.39075	Pdae_AA_04	8.15047		Phar_SA_04	6.25249	Pdae_SY_04	3.93625	Pdae_AA_04	7.40726
	Phar_SA_05	6.98654	Pdae_SY_05	5.67866	Pdae_AA_05	9.48495		Phar_SA_05	6.9999	Pdae_SY_05	5.9706	Pdae_AA_05	9.32037
	Phar_SA_06	6.14394	Pdae_SY_06	6.87902	Pdae_AA_06	8.68021		Phar_SA_06	5.77036	Pdae_SY_06	5.70414	Pdae_AA_06	8.42831
	Phar_SA_07	7.06086	Pdae_SY_07	6.28113	Pdae_AA_07	7.93958		Phar_SA_07	6.013	Pdae_SY_07	6.31505	Pdae_AA_07	7.24444
	Phar_SA_08	6.4428	Pdae_SY_08	6.61119	Pdae_AA_08	8.73522		Phar_SA_08	5.73352	Pdae_SY_08	4.90975	Pdae_AA_08	8.70358
	Phar_SA_09	8.8133	Pdae_SY_09	6.02328	Pdae_AA_09	9.08431		Phar_SA_09	4.83664	Pdae_SY_09	5.73664	Pdae_AA_09	5.61048
	Phar_SA_10	5.35507	Pdae_SY_10	5.26331	Pdae_AA_10	8.54548		Phar_SA_10	4.8133	Pdae_SY_10	5.59021	Pdae_AA_10	8.48917
			Phar_SY_01	5.03032	Phar_AA_01	8.1948				Phar_SY_01	5.33152	Phar_AA_01	7.52462
			Phar_SY_02	6.72137	Phar_AA_02	9.21751				Phar_SY_02	4.2532	Phar_AA_02	10.3061
			Phar_SY_03	5.24499	Phar_AA_03	8.8635				Phar_SY_03	4.9177	Phar_AA_03	8.59344
			Phar_SY_04	7.12509	Phar_AA_04	8.6069				Phar_SY_04	7.80735	Phar_AA_04	10.6207
			Phar_SY_05	5.32889	Phar_AA_05	8.11863				Phar_SY_05	5.65544	Phar_AA_05	8.66426
			Phar_SY_06	6.25006	Phar_AA_06	8.02954				Phar_SY_06	5.70556	Phar_AA_06	6.30726
			Phar_SY_07	4.93398	Phar_AA_07	8.75993				Phar_SY_07	6.60123	Phar_AA_07	7.72015
			Phar_SY_08	6.28939	Phar_AA_08	9.07668				Phar_SY_08	6.81565	Phar_AA_08	9.06869
			Phar_SY_09	5.19811	Phar_AA_09	8.8972				Phar_SY_09	5.87603	Phar_AA_09	8.83088
			Phar_SY_10	6.14044	Phar_AA_10	6.8308				Phar_SY_10	5.83786	Phar_AA_10	7.36111
